# Supplementary material for: The Cofilin Phosphatase Slingshot Homolog 1 (SSH1) Links NOD1 Signaling to Actin Remodeling
Source: PubMed Central journal article supplement (PMC4154870; doi:10.1371/journal.ppat.1004351), 2014-09-04

# Bielig et al., Figure S2

**A**

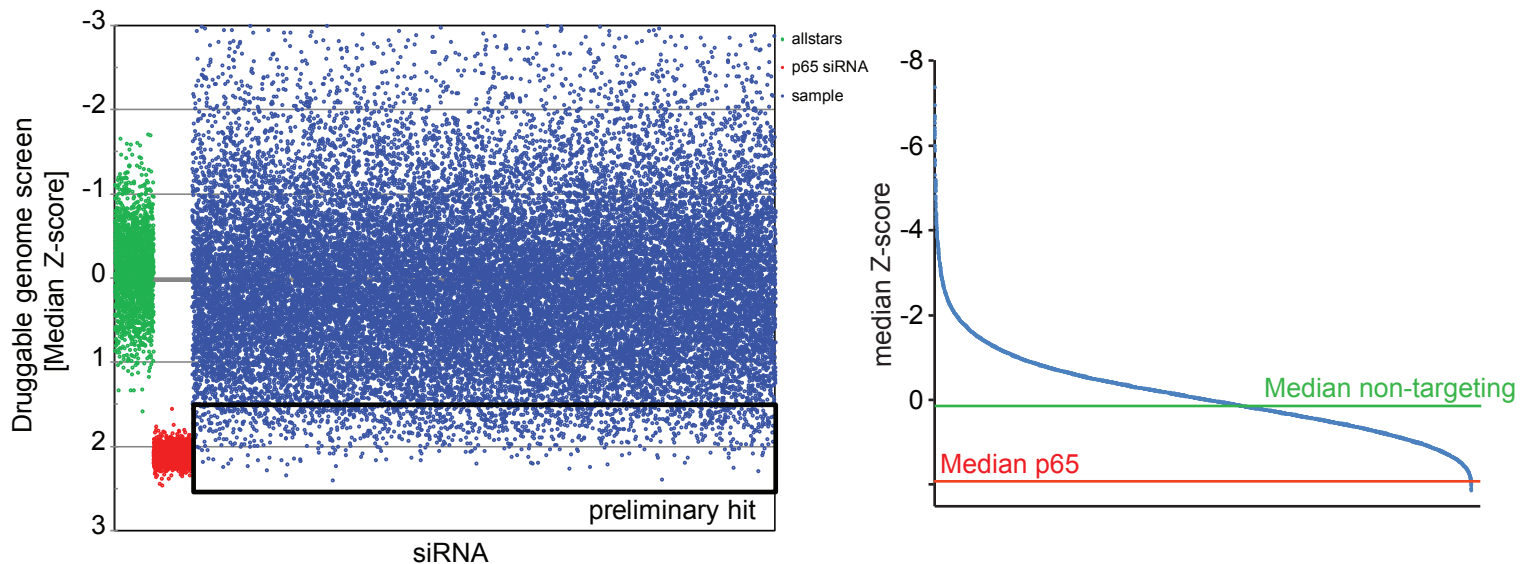

**B**

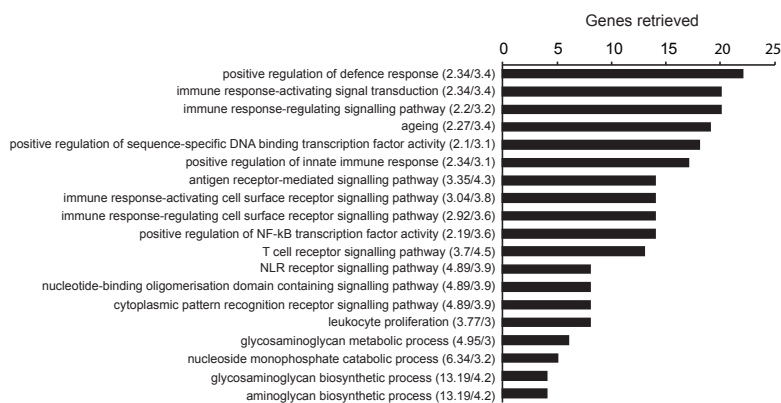

**C**

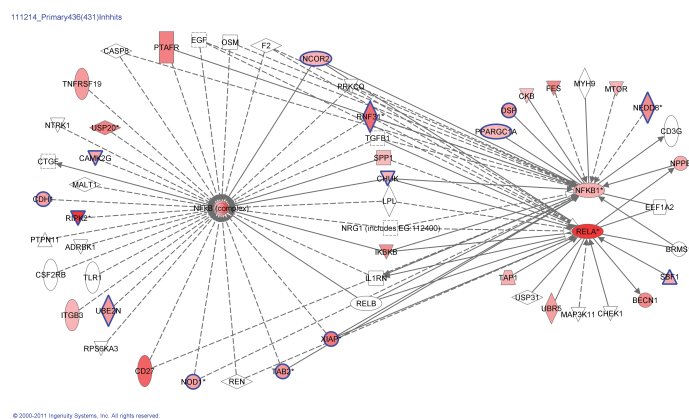

**D**

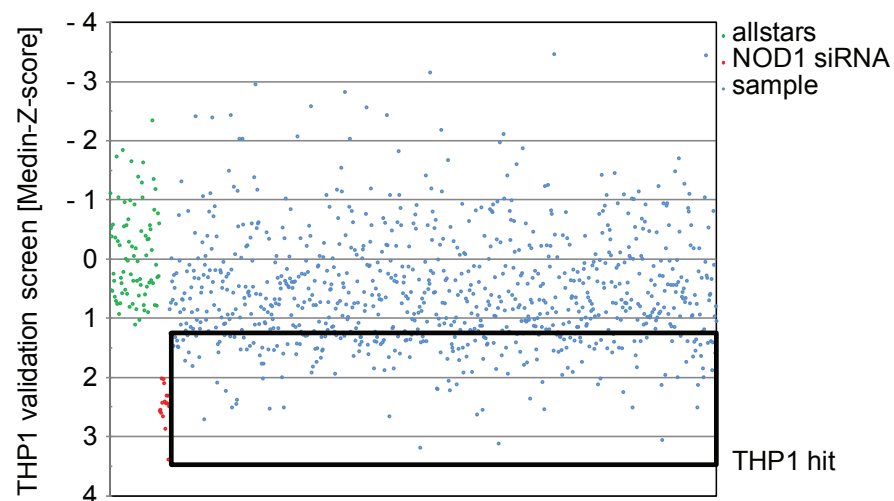

**E**

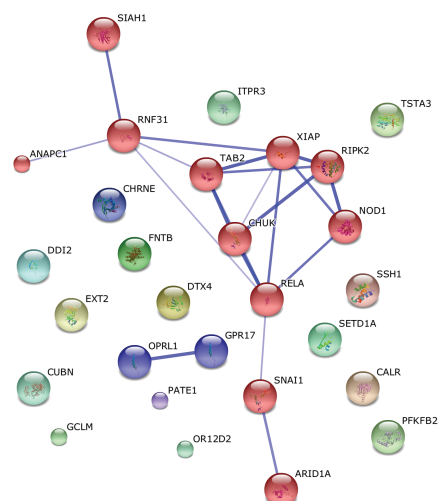

Supplement: ppat.1004351.s002.pdf [file ppat.1004351.s002.pdf]
