# Supplementary material for: The Cofilin Phosphatase Slingshot Homolog 1 (SSH1) Links NOD1 Signaling to Actin Remodeling
Source: PubMed Central journal article supplement (PMC4154870; doi:10.1371/journal.ppat.1004351), 2014-09-04

# Bielig et al. , Figure S3

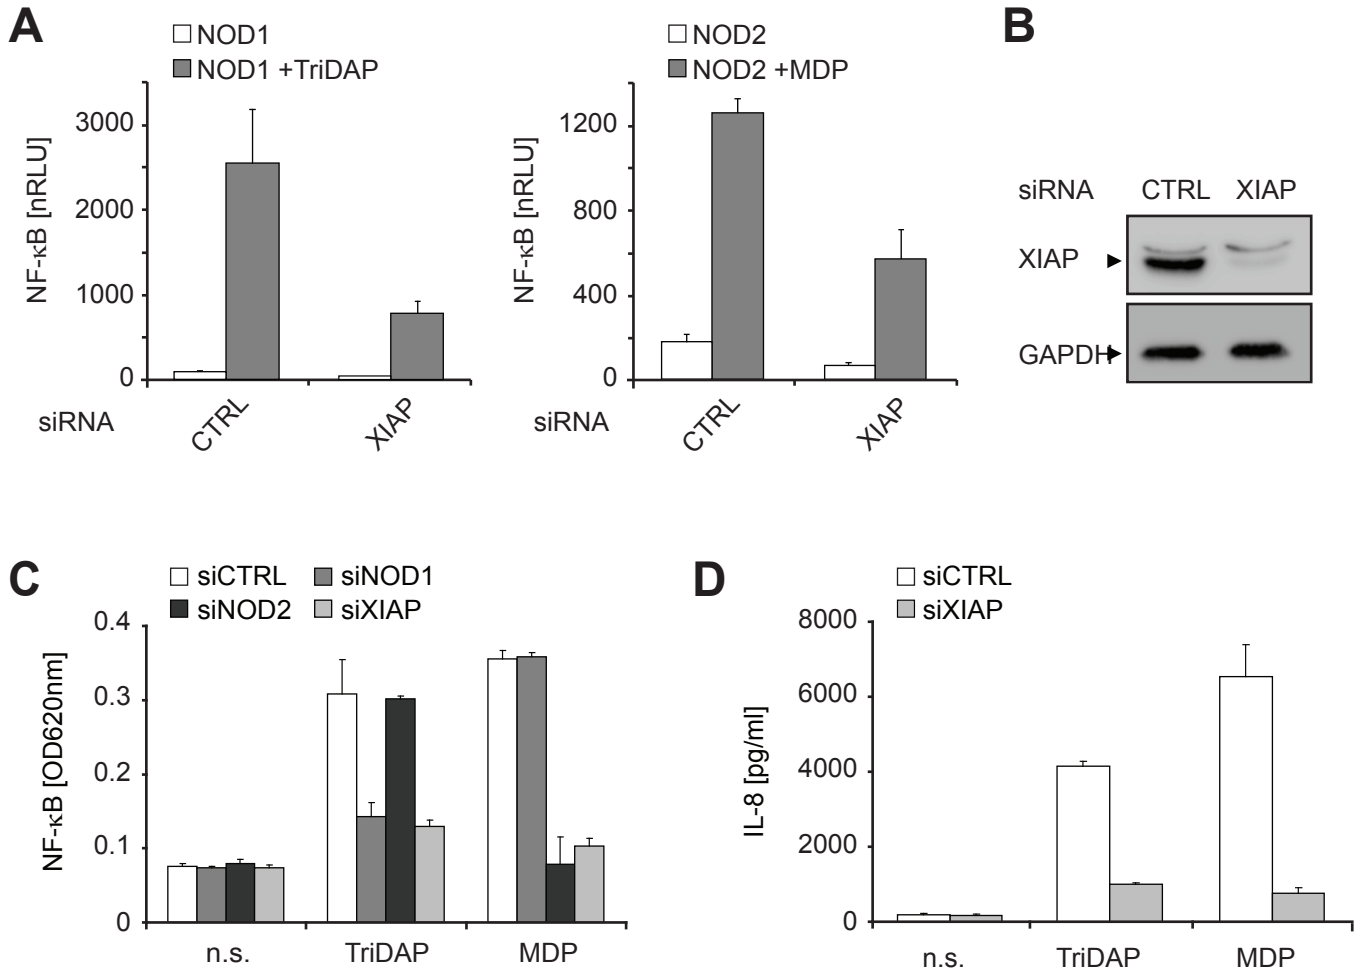

Supplement: ppat.1004351.s003.pdf [file ppat.1004351.s003.pdf]
