# Supplementary material for: The Cofilin Phosphatase Slingshot Homolog 1 (SSH1) Links NOD1 Signaling to Actin Remodeling
Source: PLoS Pathog. 2014 Sep 4;10(9):e1004351. doi: 10.1371/journal.ppat.1004351 (PMC4154870; doi:10.1371/journal.ppat.1004351)
Supplement: Table S1 — Screen data. (A) Gene-based list of the inhibiting hits from the HEK293T siRNA-screen. Genes are ranked according to the logP-values derived by applying the RSA-algorithm to the median Z-scores of the four individual siRNAs per gene. (B) Gene-based list of the hits validated in HEK293T cells. Genes are ranked according to the median Z-score of the strongest siRNA. Genes specifically involved in TriDAP-induced NF-κB activation are shown in bold. (C) siRNA-based list of the data obtained from the three secondary screens validation and counter screen using HEK293T cells, as well as the THP1 validation screen. (XLSX) [file ppat.1004351.s009.xlsx]

## Sheet: A - primary HEK screen 
Gene-based list of the inhibiting hits from the HEK293T siRNA-screen
Gene Rank	GeneID	GeneSymbol	Hit siRNAs	LogP	P-value
1	5970	RELA	4	-10.9666	1.07984e-11
2	8767	RIPK2	2	-8.00165	9.96206e-09
3	55072	RNF31	4	-5.84493	1.42913e-06
4	9902	MRC2	4	-5.51241	3.07321e-06
5	7086	TKT	3	-5.26625	5.41692e-06
6	999	CDH1	4	-4.39628	4.01532e-05
7	9743	RICS	4	-4.24072	5.74484e-05
8	56920	LOC56920	4	-4.16592	6.82457e-05
9	4035	LRP1	2	-4.02592	9.42061e-05
10	1949	EFNB3	3	-3.97333	0.000106334
11	23193	GANAB	4	-3.85838	0.000138556
12	5360	PLTP	3	-3.85724	0.000138918
13	8243	SMC1L1	2	-3.82612	0.000149238
14	1152	CKB	2	-3.82121	0.000150936
15	4627	MYH9	3	-3.71465	0.000192909
16	3551	IKBKB	3	-3.56631	0.000271453
17	25929	GEMIN5	3	-3.54839	0.000282885
18	5028	P2RY1	3	-3.54047	0.000288091
19	6692	SPINT1	3	-3.46764	0.000340687
20	8654	PDE5A	2	-3.43653	0.000365989
21	28951	TRIB2	3	-3.42649	0.000374547
22	2585	GALK2	3	-3.39434	0.000403331
23	331	BIRC4	3	-3.38086	0.000416049
24	3690	ITGB3	3	-3.25429	0.000556818
25	3976	LIF	3	-3.24976	0.000562654
26	51560	RAB6B	2	-3.21128	0.000614778
27	2539	G6PD	3	-3.20731	0.000620419
28	939	TNFRSF7	2	-3.17617	0.00066655
29	5934	RBL2	3	-3.16388	0.000685679
30	4034	LRCH4	2	-3.14798	0.000711241
31	3692	ITGB4BP	3	-3.14478	0.000716507
32	10202	DHRS2	3	-3.1365	0.000730298
33	55824	PAG	3	-3.12819	0.00074441
34	2041	EPHA1	3	-3.12068	0.000757393
35	11054	OGFR	2	-3.09149	0.000810041
36	3718	JAK3	2	-3.08775	0.000817058
37	1668	DEFA3	3	-3.07431	0.000842732
38	84893	FBXO18	3	-3.06929	0.000852535
39	9049	AIP	2	-3.06169	0.000867586
40	9187	SLC24A1	2	-3.06012	0.00087072
41	5742	PTGS1	3	-3.0461	0.0008993
42	9734	HDAC9	3	-3.04214	0.000907533
43	10058	ABCB6	3	-3.01108	0.00097482
44	54850	FBXL12	3	-3.00324	0.000992561
45	2986	GUCY2F	3	-2.98342	0.00103891
46	23636	NUP62	3	-2.97941	0.00104856
47	36	ACADSB	2	-2.95483	0.00110962
48	4591	TRIM37	3	-2.92066	0.00120044
49	948	CD36	3	-2.91227	0.00122385
50	1718	DHCR24	3	-2.90923	0.00123244
51	9752	PCDHA9	2	-2.90465	0.00124553
52	9612	NCOR2	2	-2.89397	0.00127654
53	4974	OMG	3	-2.88215	0.00131173
54	29081	HSPC133	3	-2.86454	0.00136603
55	9248	GPR50	2	-2.85635	0.00139203
56	9088	PKMYT1	2	-2.83398	0.00146562
57	5287	PIK3C2B	2	-2.82763	0.0014872
58	7096	TLR1	2	-2.80492	0.00156705
59	8029	CUBN	3	-2.79619	0.00159885
60	10350	ABCA9	3	-2.78928	0.00162449
61	25907	RIS1	2	-2.78285	0.00164874
62	8660	IRS2	3	-2.76269	0.00172705
63	1176	AP3S1	2	-2.7495	0.00178032
64	339403	RLN3R2	2	-2.70455	0.00197446
65	7084	TK2	3	-2.66916	0.00214211
66	811	CALR	3	-2.66167	0.00217936
67	1490	CTGF	3	-2.64991	0.00223919
68	10868	USP20	2	-2.64764	0.0022509
69	6815	STYX	3	-2.64745	0.00225192
70	143630	MGC20470	2	-2.64511	0.00226407
71	112755	STX1B2	2	-2.63641	0.0023099
72	5817	PVR	3	-2.63156	0.00233582
73	89894	LOC89894	3	-2.61707	0.00241505
74	1832	DSP	2	-2.60617	0.00247643
75	2895	GRID2	3	-2.60157	0.00250283
76	4986	OPRK1	3	-2.56882	0.00269887
77	5781	PTPN11	2	-2.55841	0.00276431
78	3681	ITGAD	3	-2.5579	0.00276758
79	196403	DTX3	2	-2.55293	0.00279944
80	5255	PHKA1	3	-2.53354	0.00292725
81	37	ACADVL	2	-2.53298	0.002931
82	51265	CDKL3	2	-2.52833	0.0029626
83	54778	RNF111	3	-2.52015	0.00301891
84	10268	RAMP3	3	-2.51075	0.00308495
85	27343	POLL	3	-2.50957	0.00309333
86	4987	OPRL1	3	-2.508	0.00310455
87	374654	KIF7	2	-2.50656	0.00311485
88	200081	DKFZp451J0118	2	-2.49908	0.00316902
89	5971	RELB	2	-2.49377	0.00320799
90	1434	CSE1L	3	-2.48298	0.00328867
91	26189	OR1A2	3	-2.47868	0.0033214
92	1513	CTSK	2	-2.46362	0.00343859
93	1281	COL3A1	2	-2.46171	0.00345373
94	5972	REN	2	-2.46158	0.00345479
95	896	CCND3	3	-2.4277	0.00373509
96	2132	EXT2	2	-2.41127	0.00387908
97	5144	PDE4D	2	-2.40819	0.00390672
98	6915	TBXA2R	2	-2.39592	0.00401862
99	2475	FRAP1	2	-2.39498	0.00402735
100	1059	CENPB	2	-2.39453	0.0040315
101	5588	PRKCQ	2	-2.39055	0.00406867
102	917	CD3G	3	-2.38968	0.00407681
103	64109	CRLF2	2	-2.3819	0.00415054
104	158158	RASEF	2	-2.38097	0.0041594
105	26289	AK5	3	-2.37776	0.00419028
106	1595	CYP51A1	2	-2.3681	0.00428452
107	6613	SUMO2	3	-2.36302	0.00433495
108	389207	LOC389207	2	-2.36223	0.00434283
109	343413	LOC343413	2	-2.35783	0.00438704
110	9293	GPR52	3	-2.34797	0.00448779
111	340665	CYP26C1	2	-2.34721	0.00449566
112	51360	MBTPS2	2	-2.34118	0.00455849
113	238	ALK	3	-2.3331	0.00464407
114	6198	RPS6KB1	2	-2.32504	0.00473109
115	5545	PRB4	3	-2.32455	0.00473641
116	5664	PSEN2	2	-2.31849	0.004803
117	142685	ASB15	3	-2.31512	0.00484038
118	112885	LOC112885	2	-2.3142	0.00485069
119	54328	GPR173	2	-2.29761	0.00503954
120	10892	MALT1	2	-2.29547	0.00506448
121	8139	GAN	2	-2.28228	0.00522061
122	10755	RGS19IP1	2	-2.28019	0.00524573
123	11252	PACSIN2	2	-2.26992	0.00537135
124	5880	RAC2	2	-2.26277	0.00546051
125	148	ADRA1A	2	-2.25864	0.00551258
126	8811	GALR2	2	-2.25704	0.00553301
127	3030	HADHA	2	-2.2444	0.00569636
128	5143	PDE4C	2	-2.22879	0.00590489
129	8678	BECN1	2	-2.21929	0.00603552
130	64096	GFRA4	2	-2.19769	0.00634325
131	4037	LRP3	2	-2.19684	0.00635561
132	3728	JUP	2	-2.18876	0.00647502
133	369	ARAF	2	-2.18785	0.00648854
134	706	BZRP	2	-2.18669	0.00650592
135	10891	PPARGC1A	2	-2.16417	0.00685222
136	11328	FKBP9	2	-2.1619	0.00688807
137	1759	DNM1	2	-2.1546	0.00700485
138	117195	MRGX3	2	-2.15267	0.00703612
139	81033	KCNH6	2	-2.14633	0.0071395
140	156	ADRBK1	2	-2.14554	0.00715255
141	50487	PLA2G3	2	-2.14478	0.00716501
142	841	CASP8	2	-2.13027	0.00740848
143	23220	DTX4	2	-2.12898	0.0074306
144	8621	CDC2L5	2	-2.11806	0.00761966
145	22858	ICK	2	-2.11634	0.00764997
146	2564	GABRE	2	-2.11413	0.00768906
147	25903	OLFML2B	2	-2.08549	0.00821323
148	257313	URP	2	-2.08418	0.00823791
149	2035	EPB41	2	-2.07734	0.00836871
150	3709	ITPR2	2	-2.07644	0.00838605
151	6339	SCNN1D	2	-2.07216	0.00846911
152	5138	PDE2A	2	-2.06718	0.00856689
153	2950	GSTP1	2	-2.06551	0.00859979
154	93624	MGC21874	2	-2.06412	0.00862734
155	9737	GPRASP1	2	-2.0607	0.0086956
156	4668	NAGA	2	-2.05539	0.00880264
157	79885	HDAC11	2	-2.05037	0.00890492
158	53904	MYO3A	2	-2.04892	0.00893468
159	51366	EDD	2	-2.03711	0.00918095
160	3956	LGALS1	2	-2.03015	0.00932925
161	79258	MELL1	2	-2.02592	0.00942067
162	23033	KIAA1117	2	-2.01127	0.00974394
163	653	BMP5	2	-2.00506	0.00988407
164	90990	KIFC2	2	-2.00416	0.00990478
165	822	CAPG	2	-1.98932	0.0102489
166	3760	KCNJ3	2	-1.98553	0.0103388
167	8438	RAD54L	2	-1.97623	0.0105625
168	4023	LPL	2	-1.97065	0.0106992
169	1084	CEACAM3	2	-1.95606	0.0110648
170	4921	DDR2	2	-1.94458	0.011361
171	659	BMPR2	2	-1.94041	0.0114707
172	6521	SLC4A1	2	-1.93544	0.0116026
173	57520	HECW2	2	-1.93486	0.0116182
174	10893	MMP24	2	-1.93446	0.011629
175	79109	MAPKAP1	2	-1.93109	0.0117195
176	84239	ATP13A4	2	-1.92063	0.0120053
177	4836	NMT1	2	-1.91889	0.0120534
178	8565	YARS	2	-1.91558	0.0121456
179	388372	CCL4L1	2	-1.9125	0.0122321
180	6097	RORC	2	-1.90923	0.0123247
181	10326	SIRPB1	2	-1.9087	0.0123396
182	2840	GPR17	2	-1.90518	0.0124401
183	5317	PKP1	2	-1.90338	0.0124917
184	51310	SLC22A17	2	-1.90135	0.0125502
185	2870	GRK6	2	-1.89648	0.0126917
186	8620	NPFF	2	-1.89562	0.0127169
187	111	ADCY5	2	-1.88502	0.0130309
188	5987	RFP	2	-1.88148	0.0131378
189	10592	SMC2L1	2	-1.87584	0.0133096
190	2049	EPHB3	2	-1.87233	0.0134175
191	8289	ARID1A	2	-1.87095	0.0134602
192	10666	CD226	2	-1.86328	0.0136999
193	1723	DHODH	2	-1.85092	0.0140955
194	26692	OR2W1	2	-1.84284	0.0143603
195	2735	GLI1	2	-1.83807	0.0145187
196	81550	TDRD3	2	-1.83406	0.0146536
197	10885	WDR3	2	-1.82169	0.015077
198	158880	USP51	2	-1.81837	0.0151925
199	390003	LOC390003	2	-1.80843	0.0155441
200	3093	HIP2	2	-1.79968	0.0158608
201	84171	LOXL4	2	-1.79943	0.0158697
202	7264	TSTA3	2	-1.79921	0.0158777
203	1407	CRY1	2	-1.79815	0.0159164
204	4883	NPR3	2	-1.79752	0.0159398
205	3354	HTR1E	2	-1.79645	0.0159791
206	5008	OSM	2	-1.7937	0.0160806
207	10221	TRIB1	2	-1.78674	0.0163402
208	55002	C13orf11	2	-1.78411	0.0164395
209	57834	CYP4F11	2	-1.78366	0.0164566
210	1145	CHRNE	2	-1.7742	0.0168191
211	1382	CRABP2	2	-1.77116	0.0169372
212	4738	NEDD8	2	-1.76993	0.0169854
213	7010	TEK	2	-1.7644	0.0172028
214	1185	CLCN6	2	-1.76317	0.0172515
215	8676	STX11	2	-1.75769	0.0174706
216	9678	PHF14	2	-1.75708	0.0174951
217	28316	CDH20	2	-1.75104	0.0177402
218	2145	EZH1	2	-1.74992	0.0177861
219	3557	IL1RN	2	-1.74564	0.0179622
220	4437	MSH3	2	-1.74504	0.0179869
221	860	RUNX2	2	-1.7379	0.0182851
222	160065	PATE	2	-1.73526	0.0183965
223	84301	DDI2	2	-1.72592	0.0187967
224	1439	CSF2RB	2	-1.72381	0.0188882
225	6905	TBCE	2	-1.72171	0.0189799
226	79865	TREML2	2	-1.72091	0.0190147
227	22861	NALP1	2	-1.7121	0.0194044
228	6928	TCF2	2	-1.70118	0.0198983
229	10749	KIF1C	2	-1.6956	0.0201556
230	219995	MGC35295	2	-1.6908	0.0203798
231	64748	LPPR2	2	-1.68796	0.0205136
232	2651	GCNT2	2	-1.68594	0.020609
233	610	HCN2	2	-1.68113	0.0208386
234	973	CD79A	2	-1.68066	0.0208613
235	26529	OR12D2	2	-1.67912	0.0209354
236	3751	KCND2	2	-1.67692	0.0210416
237	8022	LHX3	2	-1.67528	0.0211215
238	10858	CYP46A1	2	-1.67418	0.0211747
239	4867	NPHP1	2	-1.66928	0.0214153
240	57559	AMSH-LP	2	-1.66686	0.0215346
241	9739	KIAA0339	2	-1.66373	0.0216907
242	837	CASP4	2	-1.66009	0.021873
243	130888	FBXO36	2	-1.65902	0.0219272
244	5305	PIP5K2A	2	-1.65741	0.0220085
245	113026	PLCD3	2	-1.654	0.0221819
246	23344	MBC2	2	-1.65284	0.0222412
247	4939	OAS2	2	-1.64889	0.0224445
248	80341	BPIL1	2	-1.64625	0.0225815
249	4296	MAP3K11	2	-1.64541	0.0226249
250	22932	POMZP3	2	-1.64477	0.0226583
251	1368	CPM	2	-1.64361	0.0227189
252	2158	F9	2	-1.63678	0.023079
253	112398	EGLN2	2	-1.6316	0.0233559
254	203100	HTRA4	2	-1.63109	0.0233838
255	284021	LOC284021	2	-1.63057	0.0234117
256	115861	TXNL6	2	-1.62541	0.0236914
257	84639	IL1F10	2	-1.62476	0.0237271
258	2912	GRM2	2	-1.62441	0.023746
259	4036	LRP2	2	-1.62284	0.0238318
260	6505	SLC1A1	2	-1.62233	0.0238599
261	6615	SNAI1	2	-1.62182	0.0238881
262	3084	NRG1	2	-1.61519	0.0242553
263	1794	DOCK2	2	-1.61291	0.0243834
264	56832	IFNK	2	-1.61034	0.0245281
265	79957	PAQR6	2	-1.60924	0.0245902
266	89778	SERPINB11	2	-1.60887	0.0246109
267	3706	ITPKA	2	-1.60711	0.0247107
268	3060	HCRT	2	-1.60311	0.0249399
269	9874	TLK1	2	-1.60161	0.025026
270	8382	NME5	2	-1.60111	0.0250548
271	2177	FANCD2	2	-1.59978	0.0251317
272	994	CDC25B	2	-1.59763	0.0252565
273	259173	ALS2CL	2	-1.59581	0.0253625
274	23604	DAPK2	2	-1.59437	0.0254466
275	9633	MTL5	2	-1.59367	0.0254879
276	6305	SBF1	2	-1.58295	0.0261244
277	10075	UREB1	2	-1.57899	0.026364
278	410	ARSA	2	-1.57705	0.0264818
279	3743	KCNA7	2	-1.57379	0.0266812
280	1803	DPP4	2	-1.56842	0.0270135
281	2131	EXT1	2	-1.56682	0.0271132
282	4868	NPHS1	2	-1.56543	0.0272
283	56244	BTNL2	2	-1.56506	0.0272234
284	9167	COX7A2L	2	-1.56474	0.0272434
285	389289	LOC389289	2	-1.56267	0.0273736
286	58508	MLL3	2	-1.55842	0.0276427
287	7040	TGFB1	2	-1.55681	0.0277453
288	390233	LOC390233	2	-1.55137	0.0280951
289	22	ABCB7	2	-1.55032	0.028163
290	55800	SCN3B	2	-1.54763	0.0283378
291	9333	TGM5	2	-1.54659	0.0284062
292	3710	ITPR3	2	-1.54587	0.0284532
293	3251	HPRT1	2	-1.54485	0.0285204
294	1147	CHUK	2	-1.54287	0.0286504
295	55715	DOK4	2	-1.54068	0.0287952
296	147011	PROCA1	2	-1.53562	0.0291327
297	388579	LOC388579	2	-1.53516	0.0291635
298	49	ACR	2	-1.53116	0.0294335
299	7942	TFEB	2	-1.5295	0.0295462
300	2730	GCLM	2	-1.52923	0.0295648
301	3835	KIF22	2	-1.52877	0.0295957
302	340205	TREML1	2	-1.52751	0.0296817
303	23118	MAP3K7IP2	2	-1.52108	0.0301244
304	3897	L1CAM	2	-1.52027	0.0301809
305	10894	XLKD1	2	-1.51929	0.0302492
306	390896	LOC390896	2	-1.51866	0.0302929
307	388097	LOC388097	2	-1.51391	0.0306258
308	56647	BCCIP	2	-1.51277	0.0307068
309	84929	FIBCD1	2	-1.51244	0.0307298
310	116143	LOC116143	2	-1.51212	0.0307527
311	51129	ANGPTL4	2	-1.50947	0.030941
312	2582	GALE	2	-1.50823	0.031029
313	5645	PRSS2	2	-1.50681	0.0311308
314	117	ADCYAP1R1	2	-1.50437	0.0313064
315	782	CACNB1	2	-1.50152	0.031512
316	3786	KCNQ3	2	-1.49453	0.0320234
317	4185	ADAM11	2	-1.4941	0.0320555
318	1950	EGF	2	-1.49288	0.0321453
319	353174	LGICZ	2	-1.49236	0.0321839
320	9177	HTR3B	2	-1.49193	0.0322161
321	3248	HPGD	2	-1.48626	0.0326393
322	2623	GATA1	2	-1.48459	0.0327649
323	2063	NR2F6	2	-1.48416	0.0327973
324	50485	SMARCAL1	2	-1.48375	0.0328285
325	5660	PSAP	2	-1.48156	0.0329943
326	7095	TLOC1	2	-1.48094	0.0330418
327	165530	CLECSF13	2	-1.48031	0.0330893
328	2874	GPS2	2	-1.4769	0.0333503
329	2147	F2	2	-1.47266	0.0336776
330	91461	LOC91461	2	-1.46886	0.0339733
331	11202	KLK8	2	-1.45469	0.0351005
332	64682	ANAPC1	2	-1.45427	0.0351339
333	840	CASP7	2	-1.45262	0.0352677
334	5054	SERPINE1	2	-1.45221	0.0353012
335	80020	FLJ23322	2	-1.44974	0.0355023
336	1519	CTSO	2	-1.44728	0.0357038
337	3626	INHBC	2	-1.44606	0.0358048
338	8388	OR1E2	2	-1.43783	0.0364898
339	91937	TIMD4	2	-1.4343	0.0367874
340	146110	LOC146110	2	-1.42949	0.0371974
341	3158	HMGCS2	2	-1.42035	0.0379887
342	8840	WISP1	2	-1.41877	0.0381271
343	29893	HUMGT198A	2	-1.41837	0.0381617
344	5646	PRSS3	2	-1.41523	0.0384391
345	2051	EPHB6	2	-1.4117	0.0387523
346	818	CAMK2G	2	-1.41131	0.0387872
347	11280	SCN11A	2	-1.40703	0.0391716
348	338339	CLECSF8	2	-1.40625	0.0392417
349	1384	CRAT	2	-1.40509	0.0393469
350	22795	NID2	2	-1.40277	0.0395577
351	5544	PRB3	2	-1.39508	0.0402638
352	51196	PLCE1	2	-1.39241	0.0405123
353	134	ADORA1	2	-1.39089	0.0406545
354	7546	ZIC2	2	-1.38899	0.0408326
355	10599	SLCO1B1	2	-1.38559	0.0411541
356	4350	MPG	2	-1.38295	0.0414048
357	6462	SHBG	2	-1.3822	0.0414766
358	2903	GRIN2A	2	-1.37658	0.0420165
359	9709	HERPUD1	2	-1.37509	0.042161
360	3915	LAMC1	2	-1.371	0.0425595
361	5013	OTX1	2	-1.35415	0.0442431
362	84432	PROK1	2	-1.35126	0.0445387
363	5504	PPP1R2	2	-1.35054	0.0446128
364	1111	CHEK1	2	-1.35018	0.0446498
365	57650	KIAA1524	2	-1.3473	0.0449466
366	824	CAPN2	2	-1.34515	0.0451698
367	57478	USP31	2	-1.34158	0.0455427
368	6360	CCL16	2	-1.33874	0.0458421
369	53615	MBD3	2	-1.33732	0.045992
370	221188	GPR114	2	-1.33484	0.046255
371	2067	ERCC1	2	-1.33308	0.0464432
372	5962	RDX	2	-1.33237	0.0465185
373	2242	FES	2	-1.32886	0.0468962
374	2775	GNAO1	2	-1.32641	0.0471613
375	10392	CARD4	2	-1.32502	0.0473131
376	57413	AD026	2	-1.32224	0.0476173
377	4888	NPY6R	2	-1.31946	0.0479223
378	4938	OAS1	2	-1.31877	0.0479987
379	7334	UBE2N	2	-1.31739	0.0481516
380	55504	TNFRSF19	2	-1.31532	0.0483813
381	3749	KCNC4	2	-1.31326	0.0486116
382	56660	KCNK12	2	-1.31189	0.0487653
383	1667	DEFA1	2	-1.30337	0.0497308
384	6890	TAP1	2	-1.30033	0.0500803
385	6197	RPS6KA3	2	-1.29697	0.0504699
386	944	TNFSF8	2	-1.29529	0.0506652
387	3799	KIF5B	2	-1.29429	0.0507825
388	7226	TRPM2	2	-1.29328	0.0508999
389	54434	SSH1	2	-1.29061	0.0512136
390	59352	LGR6	2	-1.28862	0.0514494
391	825	CAPN3	2	-1.28762	0.0515674
392	5653	KLK6	2	-1.28597	0.0517645
393	79315	ELTD1	2	-1.28267	0.0521595
394	59350	LGR7	2	-1.28036	0.0524367
395	2890	GRIA1	2	-1.27774	0.0527543
396	4149	MAX	2	-1.27709	0.0528339
397	23765	IL17R	2	-1.27415	0.0531924
398	57132	CHMP1.5	2	-1.27383	0.0532323
399	5724	PTAFR	2	-1.27252	0.053392
400	1142	CHRNB3	2	-1.27123	0.0535519
401	6541	SLC7A1	2	-1.26961	0.053752
402	10863	ADAM28	2	-1.26896	0.0538322
403	27030	MLH3	2	-1.26863	0.0538723
404	4914	NTRK1	2	-1.2667	0.0541131
405	7272	TTK	2	-1.26605	0.0541935
406	4790	NFKB1	2	-1.26444	0.0543946
407	6137	RPL13	2	-1.26412	0.0544349
408	5208	PFKFB2	2	-1.2622	0.0546768
409	3036	HAS1	2	-1.26028	0.0549191
410	4879	NPPB	2	-1.25391	0.05573
411	51136	LOC51136	2	-1.25328	0.0558114
412	64419	FLJ22405	2	-1.24854	0.0564232
413	8314	BAP1	2	-1.24384	0.0570378
414	26469	PTPN18	2	-1.24134	0.0573667
415	2990	GUSB	2	-1.23823	0.0577789
416	5774	PTPN3	2	-1.2339	0.0583581
417	3914	LAMB3	2	-1.23267	0.058524
418	5145	PDE6A	2	-1.23205	0.058607
419	6477	SIAH1	2	-1.23174	0.0586485
420	51213	LUZP4	2	-1.2299	0.058898
421	84708	LNX	2	-1.22898	0.0590229
422	1917	EEF1A2	2	-1.22714	0.059273
423	9869	SETDB1	2	-1.22531	0.0595235
424	6690	SPINK1	2	-1.22136	0.0600678
425	55966	SHREW1	2	-1.22015	0.0602357
426	154043	MAGI1	2	-1.21773	0.0605721
427	5330	PLCB2	2	-1.21712	0.0606563
428	84868	HAVCR2	2	-1.21442	0.0610358
429	6696	SPP1	2	-1.21261	0.0612894
430	25855	BRMS1	2	-1.21202	0.061374
431	2342	FNTB	2	-1.21022	0.0616282
432	7113	TMPRSS2	2	-1.20933	0.0617554
433	9126	CSPG6	2	-1.20903	0.0617978
434	10393	ANAPC10	2	-1.20813	0.0619252
435	5127	PCTK1	2	-1.20605	0.0622228

## Sheet: B - validated hits
Gene-based list of the hits validated in HEK293T cells.
Gene Rank unspecific (specific)	GeneID	GeneSymbol	Median Z-score (strongest siRNA)
1 (1)	8767	RIPK2	3
2	5970	RELA	2.98
3 (2)	5660	PSAP	2.56
4	9088	PKMYT1	2.54
5	5144	PDE4D	2.47
6 (3)	2585	GALK2	2.44
7	939	CD27	2.41
8	410	ARSA	2.39
9	1759	DNM1	2.38
10	9344	TAOK2	2.33
11 (4)	55072	RNF31	2.29
12	112398	EGLN2	2.22
13	5013	OTX1	2.2
14	8438	RAD54L	2.19
15	6928	HNF1B	2.15
16	4035	LRP1	2.14
17	2564	GABRE	2.13
18 (5)	331	XIAP	2.12
19 (6)	1368	CPM	2.12
20 (7)	9874	TLK1	2.11
21	6521	SLC4A1	2.09
22	5724	PTAFR	2.05
23 (8)	10202	DHRS2	2.05
24	219995	MS4A15	2.04
25 (9)	10326	SIRPB1	2.04
26	10868	USP20	2.03
27	5143	PDE4C	2.01
28	7264	TSTA3	1.97
29 (10)	6615	SNAI1	1.96
30	2242	FES	1.95
31	4938	OAS1	1.95
32	140	ADORA3	1.95
33	59352	LGR6	1.95
34	653	BMP5	1.95
35	8678	BECN1	1.95
36 (11)	1407	CRY1	1.95
37	64419	MTMR14	1.94
38 (12)	10058	ABCB6	1.94
39 (13)	5646	PRSS3	1.92
40	6097	RORC	1.91
41	6505	SLC1A1	1.91
42 (14)	4738	NEDD8	1.9
43	5934	RBL2	1.89
44 (15)	259173	ALS2CL	1.89
45	340665	CYP26C1	1.87
46	5305	PIP4K2A	1.87
47	3551	IKBKB	1.87
48	50487	PLA2G3	1.86
49	23033	DOPEY1	1.86
50 (16)	343413	FCRL6	1.83
51	2035	EPB41	1.83
52	3710	ITPR3	1.82
53 (17)	36	ACADSB	1.82
54 (18)	9902	MRC2	1.82
55	26529	OR12D2	1.81
56 (19)	1142	CHRNB3	1.81
57	1667	DEFA1	1.8
58 (20)	2890	GRIA1	1.8
59	57650	KIAA1524	1.79
60 (21)	23118	TAB2	1.79
61	57520	HECW2	1.78
62	8243	SMC1A	1.78
63	6915	TBXA2R	1.76
64	22932	POMZP3	1.75
65	55504	TNFRSF19	1.74
66	944	TNFSF8	1.74
67 (22)	2840	GPR17	1.74
68 (23)	7334	UBE2N	1.73
69 (24)	1832	DSP	1.73
70	7084	TK2	1.71
71	64096	GFRA4	1.71
72 (25)	11202	KLK8	1.71
73 (26)	117195	MRGPRX3	1.71
74	154043	CNKSR3	1.7
75	203100	HTRA4	1.7
76	64109	CRLF2	1.69
77	2870	GRK6	1.69
78	23604	DAPK2	1.69
79 (27)	1145	CHRNE	1.69
80 (28)	4437	MSH3	1.69
81	51366	UBR5	1.68
82	23636	NUP62	1.68
83	5054	SERPINE1	1.68
84	10221	TRIB1	1.67
85	9333	TGM5	1.67
86	81550	TDRD3	1.66
87 (29)	10392	NOD1	1.65
88 (30)	9752	PCDHA9	1.65
89	257313	UTS2D	1.64
90 (31)	999	CDH1	1.64
91 (32)	26469	PTPN18	1.63
92	7942	TFEB	1.62
93	9709	HERPUD1	1.62
94	1281	COL3A1	1.61
95	9126	SMC3	1.6
96	4868	NPHS1	1.6
97	4921	DDR2	1.59
98	58508	MLL3	1.59
99	117	ADCYAP1R1	1.59
100	973	CD79A	1.59
101 (33)	659	BMPR2	1.59
102 (34)	3835	KIF22	1.59
103	2874	GPS2	1.58
104	111	ADCY5	1.57
105 (35)	818	CAMK2G	1.57
106 (36)	7086	TKT	1.57
107	3751	KCND2	1.56
108 (37)	54850	FBXL12	1.56
109	n.a.	LOC388097	1.53
110	147011	PROCA1	1.51
111	4036	LRP2	1.51
112	4879	NPPB	1.51
113 (38)	6305	SBF1	1.51
114	6905	TBCE	1.5
115	3251	HPRT1	1.5
116	196403	DTX3	1.49
117	6890	TAP1	1.48
118	4790	NFKB1	1.48
119	84239	ATP13A4	1.48
120	2775	GNAO1	1.46
121 (39)	4350	MPG	1.46
122	3976	LIF	1.45
123	22795	NID2	1.45
124	3030	HADHA	1.45
125	6339	SCNN1D	1.44
126 (40)	9612	NCOR2	1.44
127	2475	MTOR	1.43
128	3681	ITGAD	1.43
129	3690	ITGB3	1.43
130 (41)	54434	SSH1	1.43
131 (42)	9734	HDAC9	1.43
132	8022	LHX3	1.42
133	2895	GRID2	1.41
134 (43)	53615	MBD3	1.41
135 (44)	5287	PIK3C2B	1.4
136	5987	TRIM27	1.39
137 (45)	353174	ZACN	1.39
138 (46)	1147	CHUK	1.39
139	1384	CRAT	1.38
140 (47)	8654	PDE5A	1.38
141 (48)	10891	PPARGC1A	1.38
142 (49)	4888	NPY6R	1.38
143	4974	OMG	1.37
144 (50)	51129	ANGPTL4	1.37
145	339403	RXFP4	1.36
146	6696	SPP1	1.36
147	9187	SLC24A1	1.36
148 (51)	26289	AK5	1.36
149 (52)	55824	PAG1	1.36
150	11280	SCN11A	1.35
151	5255	PHKA1	1.35
152 (53)	1668	DEFA3	1.35
153	9869	SETDB1	1.34
154 (54)	50485	SMARCAL1	1.34
155 (55)	1434	CSE1L	1.33
156 (56)	238	ALK	1.33
157 (57)	79258	MMEL1	1.33
158	54328	GPR173	1.32
159 (58)	896	CCND3	1.32
160 (59)	2651	GCNT2	1.31
161	1513	CTSK	1.29
162 (60)	4836	NMT1	1.29
163 (61)	113026	PLCD3	1.29
164 (62)	84929	FIBCD1	1.29
165	116143	WDR92	1.28
166	6477	SIAH1	1.28
167	811	CALR	1.28
168	1152	CKB	1.27
169	5360	PLTP	1.27
170 (63)	5880	RAC2	1.27
171 (64)	84171	LOXL4	1.27
172 (65)	2539	G6PD	1.27
173 (66)	338339	CLEC4D	1.27

## Sheet: C - comparison of all screens
siRNA-based list of the data obtained from the three secondary screens validation and counter screen using HEK293T cells, as well as the THP1 validation screen
Annotation			HEK293T cells				THP1 cells
siRNA-ID (QIAGEN)	NCBI Gene-ID	Gene Symbol	Tri-DAP (median Z-score)	Tri-DAP hit siRNA	TNF (median Z-score)	TNF hit siRNA	Tri-DAP (median Z-score)	Tri-DAP hit siRNA
Hs_ABCB7_2	22	ABCB7	-0.45	no	0.42	no	0.87	no
Hs_ABCB7_4	22	ABCB7	-1.84	no	-2.16	no	0.11	no
Hs_ACADSB_2	36	ACADSB	1.82	yes	1.16	no	0.86	no
Hs_ACADSB_1	36	ACADSB	1.25	no	1.57	yes	1.65	yes
Hs_ACADVL_4	37	ACADVL	0.94	no	1.07	no	1.68	yes
Hs_ACADVL_2	37	ACADVL	-0.49	no	0.11	no	0.77	no
Hs_ACR_3	49	ACR	0.58	no	1.19	no	0.45	no
Hs_ACR_1	49	ACR	-0.83	no	n.d.	no	0.85	no
Hs_ADCY5_2	111	ADCY5	1.57	yes	1.55	yes	-0.02	no
Hs_ADCY5_1	111	ADCY5	0.75	no	-0.75	no	0.89	no
Hs_ADCYAP1R1_1	117	ADCYAP1R1	1.59	yes	1.8	yes	0.68	no
Hs_ADCYAP1R1_4	117	ADCYAP1R1	-2.76	no	-0.66	no	0.93	no
Hs_ADORA1_3	134	ADORA1	n.d.	no	n.d.	no	-0.19	no
Hs_ADORA1_5	134	ADORA1	0.69	no	0	no	0.29	no
Hs_AD026_5	140	ADORA3	1.95	yes	1.95	yes	0.58	no
Hs_AD026_6	140	ADORA3	1.39	yes	1.74	yes	1.2	yes
Hs_ADRA1A_3	148	ADRA1A	n.d.	no	n.d.	no	1.36	yes
Hs_ADRA1A_1	148	ADRA1A	1.23	no	1.54	yes	-1.24	no
Hs_ADRBK1_1	156	ADRBK1	1.12	no	1.27	no	-0.17	no
Hs_ADRBK1_5	156	ADRBK1	-0.05	no	0.4	no	-0.67	no
Hs_ALK_3	238	ALK	1.33	yes	0.99	no	1.71	yes
Hs_ALK_6	238	ALK	-0.19	no	0.64	no	0.34	no
Hs_BIRC4_2	331	XIAP	2.12	yes	-0.6	no	2.18	yes
Hs_BIRC4_7	331	XIAP	2.12	yes	n.d.	no	2.62	yes
Hs_ARAF_5	369	ARAF	0.46	no	1.34	no	-0.19	no
Hs_ARAF_6	369	ARAF	-0.55	no	-1.72	no	1.4	yes
Hs_ARSA_2	410	ARSA	2.39	yes	2.22	yes	1.25	yes
Hs_ARSA_1	410	ARSA	1.46	yes	1.5	yes	-0.24	no
Hs_HCN2_4	610	HCN2	n.d.	no	n.d.	no	0.12	no
Hs_HCN2_3	610	HCN2	n.d.	no	n.d.	no	0.89	no
Hs_BMP5_4	653	BMP5	1.95	yes	1.78	yes	0.94	no
Hs_BMP5_2	653	BMP5	1.36	yes	1.84	yes	-0.2	no
Hs_BMPR2_4	659	BMPR2	1.59	yes	0.48	no	-0.06	no
Hs_BMPR2_6	659	BMPR2	1	no	0.55	no	1.31	yes
Hs_BZRP_3	706	TSPO	0.9	no	0.95	no	1.13	no
Hs_BZRP_4	706	TSPO	0.84	no	n.d.	no	0.98	no
Hs_CACNB1_2	782	CACNB1	0.74	no	1.72	yes	0.43	no
Hs_CACNB1_3	782	CACNB1	0.18	no	-0.16	no	0.92	no
Hs_CALR_7	811	CALR	1.28	yes	1.75	yes	2.12	yes
Hs_CALR_9	811	CALR	0.19	no	0.21	no	2.52	yes
Hs_CAMK2G_1	818	CAMK2G	1.57	yes	0.82	no	1.93	yes
Hs_CAMK2G_6	818	CAMK2G	0.63	no	0.71	no	-0.25	no
Hs_CAPG_2	822	CAPG	0.58	no	0.65	no	0.24	no
Hs_CAPG_1	822	CAPG	-1.46	no	0.95	no	0.81	no
Hs_CAPN3_4	825	CAPN3	n.d.	no	n.d.	no	2.44	yes
Hs_CAPN3_3	825	CAPN3	1.21	no	1.24	no	0.72	no
Hs_CASP4_3	837	CASP4	n.d.	no	n.d.	no	0.37	no
Hs_CASP4_6	837	CASP4	n.d.	no	n.d.	no	-0.4	no
Hs_CASP7_4	840	CASP7	n.d.	no	n.d.	no	0.5	no
Hs_CASP7_6	840	CASP7	1.06	no	0.59	no	1.56	yes
Hs_CASP8_9	841	CASP8	n.d.	no	1.29	no	1.21	yes
Hs_CASP8_2	841	CASP8	-1.15	no	-1.14	no	-0.33	no
Hs_RUNX2_4	860	RUNX2	0.95	no	0.64	no	0.58	no
Hs_RUNX2_1	860	RUNX2	-1.17	no	n.d.	no	0.35	no
Hs_CCND3_2	896	CCND3	1.32	yes	1.36	no	0.94	no
Hs_CCND3_3	896	CCND3	0.48	no	n.d.	no	0.67	no
Hs_CD3G_6	917	CD3G	0.26	no	0.28	no	1.43	yes
Hs_CD3G_2	917	CD3G	-0.08	no	0.66	no	0.75	no
Hs_TNFRSF7_3	939	CD27	n.d.	no	1.1	no	-0.83	no
Hs_TNFRSF7_1	939	CD27	2.41	yes	2.49	yes	-1.43	no
Hs_TNFSF8_5	944	TNFSF8	1.74	yes	1.83	yes	0.7	no
Hs_TNFSF8_3	944	TNFSF8	1.21	no	1.51	yes	-0.36	no
Hs_CD36_1	948	CD36	n.d.	no	n.d.	no	-1.49	no
Hs_CD36_5	948	CD36	-1.16	no	0.21	no	1.25	yes
Hs_CD79A_4	973	CD79A	1.59	yes	1.39	yes	-0.05	no
Hs_CD79A_3	973	CD79A	0.4	no	0.43	no	1.46	yes
Hs_CDC25B_11	994	CDC25B	1.02	no	n.d.	no	1.99	yes
Hs_CDC25B_9	994	CDC25B	-1.32	no	-0.92	no	0.01	no
Hs_CDH1_12	999	CDH1	1.64	yes	1.27	no	-0.58	no
Hs_CDH1_2	999	CDH1	0.05	no	0.22	no	0.31	no
Hs_CENPB_1	1059	CENPB	1.23	no	1.5	yes	0.74	no
Hs_CENPB_2	1059	CENPB	1.1	no	1.55	yes	1.31	yes
Hs_CEACAM3_2	1084	CEACAM3	1.1	no	1.41	yes	0.56	no
Hs_CEACAM3_1	1084	CEACAM3	-0.19	no	0.84	no	-0.56	no
Hs_CHEK1_13	1111	CHEK1	1.08	no	1.86	yes	-0.63	no
Hs_CHEK1_11	1111	CHEK1	0.83	no	0.86	no	1.31	yes
Hs_CHRNB3_3	1142	CHRNB3	1.81	yes	-3.03	no	1.63	yes
Hs_CHRNB3_2	1142	CHRNB3	0.43	no	-0.4	no	0.29	no
Hs_CHRNE_1	1145	CHRNE	1.69	yes	0.06	no	1.9	yes
Hs_CHRNE_3	1145	CHRNE	1.54	yes	1.99	yes	1.49	yes
Hs_CHUK_5	1147	CHUK	1.39	yes	0.93	no	1.21	yes
Hs_CHUK_6	1147	CHUK	1.14	no	0.58	no	1.37	yes
Hs_CKB_3	1152	CKB	n.d.	no	n.d.	no	-3.45	no
Hs_CKB_5	1152	CKB	1.27	yes	2.26	yes	0.54	no
Hs_AP3S1_1	1176	AP3S1	0.23	no	0.65	no	1.09	no
Hs_AP3S1_7	1176	AP3S1	-0.17	no	0.46	no	0.7	no
Hs_CLCN6_2	1185	CLCN6	-0.07	no	0.71	no	0.68	no
Hs_CLCN6_4	1185	CLCN6	-0.34	no	-1.81	no	1.76	yes
Hs_COL3A1_1	1281	COL3A1	1.61	yes	1.62	yes	-0.3	no
Hs_COL3A1_2	1281	COL3A1	-0.16	no	-0.31	no	0.91	no
Hs_CPM_4	1368	CPM	2.12	yes	n.d.	no	0.19	no
Hs_CPM_1	1368	CPM	-0.04	no	n.d.	no	0.04	no
Hs_CRABP2_4	1382	CRABP2	n.d.	no	n.d.	no	0.67	no
Hs_CRABP2_3	1382	CRABP2	0.72	no	0.18	no	1.81	yes
Hs_CRAT_1	1384	CRAT	1.38	yes	1.59	yes	0.18	no
Hs_CRAT_4	1384	CRAT	-0.64	no	0.61	no	-0.85	no
Hs_CRY1_3	1407	CRY1	1.95	yes	0.73	no	1.06	no
Hs_CRY1_5	1407	CRY1	-0.51	no	n.d.	no	-0.29	no
Hs_CSE1L_7	1434	CSE1L	1.33	yes	1.09	no	0.36	no
Hs_CSE1L_4	1434	CSE1L	1.2	no	1.52	yes	0.1	no
Hs_CSF2RB_2	1439	CSF2RB	n.d.	no	n.d.	no	1.42	yes
Hs_CSF2RB_4	1439	CSF2RB	0.65	no	0.82	no	0.47	no
Hs_CTGF_1	1490	CTGF	1.17	no	1.42	yes	-0.03	no
Hs_CTGF_4	1490	CTGF	0.54	no	1.67	yes	0.73	no
Hs_CTSK_3	1513	CTSK	1.29	yes	2.09	yes	0.56	no
Hs_CTSK_2	1513	CTSK	0	no	0.05	no	1.09	no
Hs_CTSO_2	1519	CTSO	0.87	no	0.99	no	0.87	no
Hs_CTSO_4	1519	CTSO	0.63	no	0.75	no	0.12	no
Hs_CYP51A1_2	1595	CYP51A1	n.d.	no	n.d.	no	-0.24	no
Hs_CYP51A1_3	1595	CYP51A1	-0.69	no	-1.43	no	1.05	no
Hs_DEFA1_2	1667	DEFA1	1.8	yes	1.68	yes	1.5	yes
Hs_DEFA1_1	1667	DEFA1	0.78	no	0.67	no	-0.95	no
Hs_DEFA3_2	1668	DEFA3	1.35	yes	1.09	no	0.14	no
Hs_DEFA3_4	1668	DEFA3	-0.62	no	-0.21	no	1.12	no
Hs_DHCR24_1	1718	DHCR24	-0.28	no	-0.35	no	1.32	yes
Hs_DHCR24_2	1718	DHCR24	-1.11	no	0.02	no	0.4	no
Hs_DHODH_2	1723	DHODH	n.d.	no	n.d.	no	1.65	yes
Hs_DHODH_3	1723	DHODH	-0.28	no	0.29	no	0.55	no
Hs_DNM1_1	1759	DNM1	2.38	yes	2.24	yes	1.24	yes
Hs_DNM1_4	1759	DNM1	2.36	yes	2.52	yes	0.02	no
Hs_DOCK2_3	1794	DOCK2	1.06	no	0.34	no	0.19	no
Hs_DOCK2_1	1794	DOCK2	0.14	no	-0.5	no	0.38	no
Hs_DPP4_3	1803	DPP4	n.d.	no	n.d.	no	0.75	no
Hs_DPP4_4	1803	DPP4	1.03	no	0.77	no	0.97	no
Hs_DSP_2	1832	DSP	1.73	yes	0.93	no	-0.4	no
Hs_DSP_3	1832	DSP	0.91	no	0.88	no	1.18	no
Hs_EEF1A2_4	1917	EEF1A2	-0.12	no	0.58	no	0.82	no
Hs_EEF1A2_6	1917	EEF1A2	-0.52	no	0.15	no	0.06	no
Hs_EFNB3_3	1949	EFNB3	n.d.	no	n.d.	no	2.11	yes
Hs_EFNB3_1	1949	EFNB3	1.11	no	-0.09	no	0.2	no
Hs_EGF_2	1950	EGF	0.92	no	-0.21	no	0.31	no
Hs_EGF_1	1950	EGF	0.28	no	0.74	no	-0.8	no
Hs_EPB41_4	2035	EPB41	1.83	yes	1.53	yes	0.84	no
Hs_EPB41_1	2035	EPB41	0.77	no	0.89	no	0.62	no
Hs_EPHA1_3	2041	EPHA1	-0.54	no	0.24	no	1.16	no
Hs_EPHA1_5	2041	EPHA1	-1.42	no	0.52	no	0.82	no
Hs_EPHB3_2	2049	EPHB3	n.d.	no	0.59	no	-1.5	no
Hs_EPHB3_5	2049	EPHB3	-0.91	no	0.05	no	0.12	no
Hs_EPHB6_1	2051	EPHB6	n.d.	no	n.d.	no	-0.35	no
Hs_EPHB6_4	2051	EPHB6	1.17	no	1.57	yes	-0.47	no
Hs_NR2F6_1	2063	NR2F6	n.d.	no	n.d.	no	-0.02	no
Hs_NR2F6_3	2063	NR2F6	0.61	no	-0.62	no	1.57	yes
Hs_ERCC1_4	2067	ERCC1	n.d.	no	n.d.	no	-0.24	no
Hs_ERCC1_5	2067	ERCC1	-0.21	no	0.44	no	0.6	no
Hs_EXT1_3	2131	EXT1	n.d.	no	n.d.	no	0.96	no
Hs_EXT1_1	2131	EXT1	0.14	no	0.5	no	-0.77	no
Hs_EXT2_2	2132	EXT2	1.2	no	1.01	no	1.27	yes
Hs_EXT2_1	2132	EXT2	-1.68	no	-0.85	no	1.38	yes
Hs_EZH1_1	2145	EZH1	0.18	no	0.65	no	0.66	no
Hs_EZH1_2	2145	EZH1	-1.22	no	-0.77	no	1.28	yes
Hs_F2_4	2147	F2	0.53	no	0.64	no	1.41	yes
Hs_F2_2	2147	F2	-0.1	no	0.67	no	0.77	no
Hs_F9_1	2158	F9	n.d.	no	n.d.	no	0.93	no
Hs_F9_2	2158	F9	0.43	no	1.24	no	0.38	no
Hs_FANCD2_3	2177	FANCD2	0.52	no	1.53	yes	-0.54	no
Hs_FANCD2_4	2177	FANCD2	0.13	no	-0.14	no	1	no
Hs_FES_5	2242	FES	1.95	yes	2.51	yes	-0.18	no
Hs_FES_6	2242	FES	0.43	no	n.d.	no	0.64	no
Hs_FNTB_1	2342	FNTB	-0.51	no	-0.63	no	1.31	yes
Hs_FNTB_4	2342	FNTB	-2.25	no	n.d.	no	1.24	yes
Hs_FRAP1_2	2475	MTOR	1.43	yes	1.77	yes	-2.04	no
Hs_FRAP1_6	2475	MTOR	0.43	no	n.d.	no	0.73	no
Hs_G6PD_2	2539	G6PD	n.d.	no	n.d.	no	-0.64	no
Hs_G6PD_3	2539	G6PD	1.27	yes	0.41	no	-1.28	no
Hs_GABRE_2	2564	GABRE	n.d.	no	n.d.	no	1.66	yes
Hs_GABRE_1	2564	GABRE	2.13	yes	2.08	yes	-0.01	no
Hs_GALE_4	2582	GALE	0.98	no	1	no	0.96	no
Hs_GALE_3	2582	GALE	0.46	no	1.18	no	0.91	no
Hs_GALK2_4	2585	GALK2	2.44	yes	n.d.	no	1.27	yes
Hs_GALK2_1	2585	GALK2	1.7	yes	1.33	no	0.93	no
Hs_GATA1_4	2623	GATA1	0.91	no	0.95	no	0.05	no
Hs_GATA1_1	2623	GATA1	0.39	no	0.55	no	1.26	yes
Hs_GCNT2_5	2651	GCNT2	n.d.	no	n.d.	no	0.26	no
Hs_GCNT2_7	2651	GCNT2	1.31	yes	0.57	no	0.94	no
Hs_GCLM_4	2730	GCLM	-0.01	no	1.05	no	1.47	yes
Hs_GCLM_1	2730	GCLM	-0.18	no	0.25	no	1.39	yes
Hs_GLI1_2	2735	GLI1	n.d.	no	n.d.	no	-0.48	no
Hs_GLI1_1	2735	GLI1	n.d.	no	n.d.	no	0.55	no
Hs_GNAO1_5	2775	GNAO1	1.46	yes	2.12	yes	1.01	no
Hs_GNAO1_4	2775	GNAO1	0.92	no	1.24	no	0.75	no
Hs_GPR17_1	2840	GPR17	n.d.	no	n.d.	no	1.63	yes
Hs_GPR17_4	2840	GPR17	1.74	yes	1.2	no	2.11	yes
Hs_GRK6_4	2870	GRK6	1.69	yes	1.56	yes	-2.42	no
Hs_GRK6_12	2870	GRK6	0.43	no	0.41	no	0.84	no
Hs_GPS2_2	2874	GPS2	1.58	yes	1.8	yes	-0.82	no
Hs_GPS2_4	2874	GPS2	0.3	no	1.36	no	1.29	yes
Hs_GRIA1_3	2890	GRIA1	1.8	yes	1.27	no	0.93	no
Hs_GRIA1_2	2890	GRIA1	0.3	no	-0.36	no	0.69	no
Hs_GRID2_3	2895	GRID2	1.41	yes	1.78	yes	0.14	no
Hs_GRID2_2	2895	GRID2	0.42	no	0.22	no	-0.02	no
Hs_GRIN2A_3	2903	GRIN2A	1.05	no	n.d.	no	1.27	yes
Hs_GRIN2A_2	2903	GRIN2A	0.39	no	0.48	no	0.92	no
Hs_GRM2_3	2912	GRM2	n.d.	no	n.d.	no	1.65	yes
Hs_GRM2_2	2912	GRM2	n.d.	no	n.d.	no	0.49	no
Hs_GSTP1_5	2950	GSTP1	0.87	no	0.79	no	-0.87	no
Hs_GSTP1_4	2950	GSTP1	-0.59	no	0.24	no	-0.54	no
Hs_GUCY2F_2	2986	GUCY2F	1.07	no	n.d.	no	-0.09	no
Hs_GUCY2F_3	2986	GUCY2F	0.32	no	0.53	no	-0.65	no
Hs_GUSB_3	2990	GUSB	1.03	no	1.85	yes	0.17	no
Hs_GUSB_4	2990	GUSB	0.68	no	0.93	no	0.95	no
Hs_HADHA_1	3030	HADHA	1.45	yes	1.48	yes	0.02	no
Hs_HADHA_2	3030	HADHA	0.43	no	0.08	no	0.74	no
Hs_HAS1_1	3036	HAS1	0.71	no	n.d.	no	0.19	no
Hs_HAS1_3	3036	HAS1	0.39	no	0.05	no	1.52	yes
Hs_HCRT_4	3060	HCRT	1.22	no	0.86	no	1	no
Hs_HCRT_2	3060	HCRT	0.68	no	0.82	no	0.71	no
Hs_NRG1_4	3084	NRG1	0.66	no	0.48	no	1.54	yes
Hs_NRG1_1	3084	NRG1	0.3	no	-0.17	no	0.72	no
Hs_HIP2_1	3093	UBE2K	-0.8	no	-0.34	no	-0.31	no
Hs_HIP2_3	3093	UBE2K	-2.51	no	-1.6	no	0.46	no
Hs_HMGCS2_2	3158	HMGCS2	n.d.	no	n.d.	no	0.2	no
Hs_HMGCS2_1	3158	HMGCS2	0.24	no	0.76	no	0.3	no
Hs_HPGD_1	3248	HPGD	n.d.	no	n.d.	no	0.73	no
Hs_HPGD_4	3248	HPGD	-0.09	no	0.06	no	-1.32	no
Hs_HPRT1_4	3251	HPRT1	1.5	yes	1.9	yes	0.73	no
Hs_HPRT1_1	3251	HPRT1	0.8	no	0.27	no	1.22	yes
Hs_HTR1E_2	3354	HTR1E	n.d.	no	n.d.	no	0.16	no
Hs_HTR1E_4	3354	HTR1E	1.11	no	-1.46	no	1.62	yes
Hs_IKBKB_6	3551	IKBKB	1.87	yes	1.87	yes	0.32	no
Hs_IKBKB_8	3551	IKBKB	0.65	no	0.28	no	0.38	no
Hs_IL1RN_2	3557	IL1RN	n.d.	no	n.d.	no	0.72	no
Hs_IL1RN_1	3557	IL1RN	-1.4	no	-0.32	no	1.52	yes
Hs_INHBC_5	3626	INHBC	0.54	no	0.65	no	0.68	no
Hs_INHBC_3	3626	INHBC	0.42	no	-0.49	no	1.84	yes
Hs_ITGAD_2	3681	ITGAD	1.43	yes	1.58	yes	-1.68	no
Hs_ITGAD_4	3681	ITGAD	0.06	no	1	no	0.92	no
Hs_ITGB3_3	3690	ITGB3	1.43	yes	1.44	yes	1.07	no
Hs_ITGB3_4	3690	ITGB3	0.48	no	0.71	no	0.74	no
Hs_ITGB4BP_3	3692	EIF6	n.d.	no	n.d.	no	0.98	no
Hs_ITGB4BP_1	3692	EIF6	0.96	no	n.d.	no	1.8	yes
Hs_ITPKA_6	3706	ITPKA	n.d.	no	1.8	yes	-0.13	no
Hs_ITPKA_3	3706	ITPKA	-0.13	no	-0.1	no	-0.93	no
Hs_ITPR2_3	3709	ITPR2	0.72	no	1.39	yes	1.25	yes
Hs_ITPR2_1	3709	ITPR2	0.35	no	0.81	no	-0.06	no
Hs_ITPR3_3	3710	ITPR3	1.82	yes	2.18	yes	1.9	yes
Hs_ITPR3_2	3710	ITPR3	0.96	no	0.9	no	1.6	yes
Hs_JAK3_2	3718	JAK3	n.d.	no	n.d.	no	-0.11	no
Hs_JAK3_5	3718	JAK3	0.15	no	n.d.	no	0.98	no
Hs_JUP_2	3728	JUP	0.82	no	0.91	no	-2.19	no
Hs_JUP_3	3728	JUP	0.45	no	1.33	no	0.84	no
Hs_KCNA7_2	3743	KCNA7	1.08	no	1.67	yes	-1.1	no
Hs_KCNA7_3	3743	KCNA7	0.31	no	0.33	no	0.56	no
Hs_KCNC4_1	3749	KCNC4	1.1	no	0.72	no	1.44	yes
Hs_KCNC4_2	3749	KCNC4	-0.16	no	n.d.	no	0.85	no
Hs_KCND2_2	3751	KCND2	1.56	yes	1.82	yes	0.77	no
Hs_KCND2_3	3751	KCND2	1.06	no	1.12	no	0.31	no
Hs_KCNJ3_3	3760	KCNJ3	n.d.	no	n.d.	no	-0.29	no
Hs_KCNJ3_2	3760	KCNJ3	-0.14	no	0.35	no	1.84	yes
Hs_KCNQ3_4	3786	KCNQ3	0.91	no	0.07	no	0.4	no
Hs_KCNQ3_2	3786	KCNQ3	0.22	no	0.48	no	0.64	no
Hs_KIF5B_3	3799	KIF5B	0.37	no	0.32	no	-0.09	no
Hs_KIF5B_6	3799	KIF5B	-0.22	no	0.62	no	1.02	no
Hs_KNS2_1	3831	KLC1	-0.38	no	1.1	no	-0.61	no
Hs_KNS2_4	3831	KLC1	-1.49	no	n.d.	no	0.84	no
Hs_KIF22_6	3835	KIF22	1.59	yes	n.d.	no	0.65	no
Hs_KIF22_1	3835	KIF22	1.5	yes	0.47	no	0.77	no
Hs_L1CAM_1	3897	L1CAM	-0.93	no	-0.47	no	1.52	yes
Hs_L1CAM_4	3897	L1CAM	-1.35	no	1.11	no	0.36	no
Hs_LAMB3_7	3914	LAMB3	n.d.	no	n.d.	no	-0.7	no
Hs_LAMB3_6	3914	LAMB3	-0.37	no	-0.12	no	-2.57	no
Hs_LAMC1_3	3915	LAMC1	0.79	no	0.57	no	1.31	yes
Hs_LAMC1_5	3915	LAMC1	0.68	no	0.47	no	0.04	no
Hs_LGALS1_1	3956	LGALS1	n.d.	no	n.d.	no	1.08	no
Hs_LGALS1_5	3956	LGALS1	0.89	no	2.03	yes	0.53	no
Hs_LIF_4	3976	LIF	n.d.	no	n.d.	no	0.57	no
Hs_LIF_2	3976	LIF	1.45	yes	2.23	yes	0.09	no
Hs_LPL_3	4023	LPL	-0.66	no	0.47	no	0.41	no
Hs_LPL_2	4023	LPL	-0.87	no	-0.1	no	0.6	no
Hs_LRCH4_5	4034	LRCH4	-0.2	no	0.76	no	0.82	no
Hs_LRCH4_1	4034	LRCH4	-1.35	no	0.64	no	-2.04	no
Hs_LRP1_4	4035	LRP1	2.14	yes	2.41	yes	0.39	no
Hs_LRP1_1	4035	LRP1	-1.2	no	-0.81	no	1.3	yes
Hs_LRP2_1	4036	LRP2	1.51	yes	1.9	yes	0.84	no
Hs_LRP2_5	4036	LRP2	-0.13	no	1.02	no	1.14	no
Hs_LRP3_1	4037	LRP3	0.72	no	0.83	no	-1.18	no
Hs_LRP3_3	4037	LRP3	0.52	no	0.64	no	1.23	yes
Hs_MAX_1	4149	MAX	0.82	no	1.77	yes	1.31	yes
Hs_MAX_4	4149	MAX	0.78	no	0.43	no	0.85	no
Hs_ADAM11_4	4185	ADAM11	n.d.	no	n.d.	no	1.12	no
Hs_ADAM11_1	4185	ADAM11	n.d.	no	n.d.	no	-1.02	no
Hs_MAP3K11_5	4296	MAP3K11	n.d.	no	n.d.	no	0.98	no
Hs_MAP3K11_6	4296	MAP3K11	0.8	no	0.42	no	1.06	no
Hs_MPG_2	4350	MPG	1.46	yes	n.d.	no	1.01	no
Hs_MPG_3	4350	MPG	0.3	no	0.86	no	0.2	no
Hs_MSH3_5	4437	MSH3	1.69	yes	n.d.	no	-2.04	no
Hs_MSH3_3	4437	MSH3	1.38	yes	1.29	no	1.19	no
Hs_TRIM37_1	4591	TRIM37	0.69	no	1.36	no	0.36	no
Hs_TRIM37_3	4591	TRIM37	0.22	no	0.03	no	1.38	yes
Hs_MYH9_2	4627	MYH9	n.d.	no	n.d.	no	1.43	yes
Hs_MYH9_5	4627	MYH9	0.87	no	1.53	yes	1.05	no
Hs_NAGA_1	4668	NAGA	0.9	no	1.22	no	0.23	no
Hs_NAGA_4	4668	NAGA	0.46	no	0.32	no	1.18	no
Hs_NEDD8_4	4738	NEDD8	1.9	yes	1.47	yes	0.19	no
Hs_NEDD8_5	4738	NEDD8	1.53	yes	1.01	no	0.53	no
Hs_NFKB1_9	4790	NFKB1	1.48	yes	1.83	yes	0.8	no
Hs_NFKB1_10	4790	NFKB1	1.47	yes	1.84	yes	0.63	no
Hs_NMT1_2	4836	NMT1	n.d.	no	n.d.	no	-0.9	no
Hs_NMT1_1	4836	NMT1	1.29	yes	1.26	no	0.83	no
Hs_NPHP1_4	4867	NPHP1	0.65	no	1.56	yes	0.76	no
Hs_NPHP1_3	4867	NPHP1	0.38	no	0.69	no	1.02	no
Hs_NPHS1_4	4868	NPHS1	n.d.	no	1.58	yes	1.12	no
Hs_NPHS1_1	4868	NPHS1	1.6	yes	1.83	yes	1.84	yes
Hs_NPPB_4	4879	NPPB	1.51	yes	1.58	yes	-0.82	no
Hs_NPPB_2	4879	NPPB	0.29	no	0.11	no	0.52	no
Hs_NPR3_2	4883	NPR3	0.63	no	-1.89	no	1.19	no
Hs_NPR3_3	4883	NPR3	0.1	no	1.3	no	0.89	no
Hs_NPY6R_4	4888	NPY6R	1.38	yes	0.53	no	0.84	no
Hs_NPY6R_1	4888	NPY6R	1.2	no	n.d.	no	0.66	no
Hs_NTRK1_1	4914	NTRK1	0.57	no	0.86	no	-0.61	no
Hs_NTRK1_4	4914	NTRK1	0.32	no	0.47	no	n.d.	no
Hs_DDR2_2	4921	DDR2	1.59	yes	1.93	yes	-0.89	no
Hs_DDR2_4	4921	DDR2	0.51	no	0.27	no	1.26	yes
Hs_OAS1_1	4938	OAS1	1.95	yes	2.09	yes	-0.02	no
Hs_OAS1_3	4938	OAS1	0.94	no	1.01	no	-2.44	no
Hs_OAS2_4	4939	OAS2	1.11	no	0.54	no	0.3	no
Hs_OAS2_1	4939	OAS2	-0.31	no	-0.79	no	1.5	yes
Hs_OMG_1	4974	OMG	1.37	yes	1.79	yes	0.66	no
Hs_OMG_3	4974	OMG	-0.18	no	0.86	no	-0.24	no
Hs_OPRK1_1	4986	OPRK1	0.97	no	0.6	no	1.99	yes
Hs_OPRK1_3	4986	OPRK1	0.65	no	-0.12	no	0.88	no
Hs_OPRL1_4	4987	OPRL1	n.d.	no	n.d.	no	1.37	yes
Hs_OPRL1_2	4987	OPRL1	0.56	no	1.15	no	1.28	yes
Hs_OSM_1	5008	OSM	0.9	no	1.11	no	-0.77	no
Hs_OSM_2	5008	OSM	-0.75	no	-0.37	no	0.18	no
Hs_OTX1_3	5013	OTX1	n.d.	no	n.d.	no	-0.16	no
Hs_OTX1_2	5013	OTX1	2.2	yes	1.96	yes	0.48	no
Hs_P2RY1_1	5028	P2RY1	0.26	no	0.44	no	1.11	no
Hs_P2RY1_3	5028	P2RY1	-1.75	no	n.d.	no	2.01	yes
Hs_SERPINE1_2	5054	SERPINE1	1.68	yes	1.59	yes	0.71	no
Hs_SERPINE1_1	5054	SERPINE1	-0.69	no	0.6	no	0.38	no
Hs_PCTK1_3	5127	CDK16	-0.16	no	0.96	no	-0.05	no
Hs_PCTK1_7	5127	CDK16	-1.02	no	-0.1	no	-1.09	no
Hs_PDE2A_3	5138	PDE2A	0.96	no	1.08	no	0.28	no
Hs_PDE2A_2	5138	PDE2A	0.61	no	1.3	no	1.14	no
Hs_PDE4C_2	5143	PDE4C	2.01	yes	1.55	yes	1.29	yes
Hs_PDE4C_1	5143	PDE4C	-0.79	no	1.16	no	0.8	no
Hs_PDE4D_3	5144	PDE4D	2.47	yes	2.51	yes	0.77	no
Hs_PDE4D_1	5144	PDE4D	0.22	no	0.13	no	0.16	no
Hs_PDE6A_3	5145	PDE6A	0.97	no	0.08	no	0.5	no
Hs_PDE6A_1	5145	PDE6A	-0.42	no	-0.75	no	0.41	no
Hs_PFKFB2_6	5208	PFKFB2	1.06	no	0.09	no	1.29	yes
Hs_PFKFB2_5	5208	PFKFB2	-0.93	no	-0.49	no	2.35	yes
Hs_PHKA1_5	5255	PHKA1	1.35	yes	2.06	yes	1.14	no
Hs_PHKA1_6	5255	PHKA1	0.02	no	-0.19	no	2.05	yes
Hs_PIK3C2B_1	5287	PIK3C2B	n.d.	no	n.d.	no	0.64	no
Hs_PIK3C2B_6	5287	PIK3C2B	1.4	yes	0.44	no	-0.57	no
Hs_PIP5K2A_6	5305	PIP4K2A	1.87	yes	2.08	yes	0.81	no
Hs_PIP5K2A_3	5305	PIP4K2A	0.57	no	0.98	no	-0.85	no
Hs_PKP1_2	5317	PKP1	n.d.	no	n.d.	no	0.42	no
Hs_PKP1_4	5317	PKP1	-0.14	no	1	no	1.43	yes
Hs_PLCB2_1	5330	PLCB2	1.21	no	1.69	yes	1.35	yes
Hs_PLCB2_3	5330	PLCB2	0.95	no	1.92	yes	-0.81	no
Hs_PLTP_3	5360	PLTP	1.27	yes	2.26	yes	1.76	yes
Hs_PLTP_2	5360	PLTP	1.22	no	0.22	no	0.68	no
Hs_PPP1R2_1	5504	PPP1R2	n.d.	no	n.d.	no	0.23	no
Hs_PPP1R2_4	5504	PPP1R2	-0.78	no	-0.6	no	1.33	yes
Hs_PRB3_1	5544	PRB3	0.81	no	0.34	no	0.41	no
Hs_PRB3_4	5544	PRB3	-0.19	no	0.69	no	0.41	no
Hs_PRB4_2	5545	PRB4	0.59	no	1.24	no	1.04	no
Hs_PRB4_1	5545	PRB4	-1.49	no	-2.67	no	0.96	no
Hs_PRKCQ_3	5588	PRKCQ	n.d.	no	n.d.	no	0.31	no
Hs_PRKCQ_4	5588	PRKCQ	0.32	no	0.96	no	1.17	no
Hs_PRSS2_5	5645	PRSS2	n.d.	no	n.d.	no	-0.41	no
Hs_PRSS2_4	5645	PRSS2	1.08	no	n.d.	no	2.5	yes
Hs_PRSS3_5	5646	PRSS3	n.d.	no	n.d.	no	-0.95	no
Hs_PRSS3_1	5646	PRSS3	1.92	yes	0.05	no	1.73	yes
Hs_KLK6_2	5653	KLK6	n.d.	no	n.d.	no	1.42	yes
Hs_KLK6_4	5653	KLK6	1.1	no	1.41	yes	0.98	no
Hs_PSAP_1	5660	PSAP	2.56	yes	n.d.	no	0.05	no
Hs_PSAP_4	5660	PSAP	1.11	no	0.69	no	1.35	yes
Hs_PSEN2_2	5664	PSEN2	n.d.	no	n.d.	no	0.72	no
Hs_PSEN2_3	5664	PSEN2	0.71	no	0.85	no	0.23	no
Hs_PTAFR_5	5724	PTAFR	2.05	yes	2.41	yes	0.38	no
Hs_PTAFR_6	5724	PTAFR	0.87	no	1.2	no	-0.23	no
Hs_PTGS1_12	5742	PTGS1	0.9	no	0.46	no	0.48	no
Hs_PTGS1_13	5742	PTGS1	0.57	no	1.8	yes	1.43	yes
Hs_PTPN3_4	5774	PTPN3	n.d.	no	n.d.	no	1.38	yes
Hs_PTPN3_3	5774	PTPN3	0.67	no	-1.03	no	0.38	no
Hs_PTPN11_4	5781	PTPN11	-0.25	no	0.35	no	0.64	no
Hs_PTPN11_1	5781	PTPN11	-2.47	no	-0.43	no	0.31	no
Hs_PVR_1	5817	PVR	n.d.	no	n.d.	no	0.32	no
Hs_PVR_2	5817	PVR	-0.68	no	0.27	no	1.85	yes
Hs_RAC2_2	5880	RAC2	1.27	yes	1.34	no	0.56	no
Hs_RAC2_1	5880	RAC2	0.3	no	-0.36	no	0.6	no
Hs_RBL2_4	5934	RBL2	1.89	yes	2.03	yes	-0.78	no
Hs_RBL2_5	5934	RBL2	0.31	no	0.23	no	2.24	yes
Hs_RDX_1	5962	RDX	1.23	no	1.74	yes	-0.53	no
Hs_RDX_5	5962	RDX	0.67	no	1.64	yes	0.09	no
Hs_RELA_6	5970	RELA	2.98	yes	3.17	yes	3.05	yes
Hs_RELA_7	5970	RELA	2.89	yes	3.38	yes	2.7	yes
Hs_RELB_3	5971	RELB	n.d.	no	n.d.	no	1.39	yes
Hs_RELB_2	5971	RELB	0.94	no	0.93	no	0.39	no
Hs_REN_3	5972	REN	n.d.	no	n.d.	no	0.11	no
Hs_REN_4	5972	REN	0.75	no	0.22	no	-0.04	no
Hs_RFP_2	5987	TRIM27	1.39	yes	1.7	yes	0.35	no
Hs_RFP_1	5987	TRIM27	-0.14	no	0.64	no	0.67	no
Hs_RORC_2	6097	RORC	n.d.	no	n.d.	no	0.99	no
Hs_RORC_1	6097	RORC	1.91	yes	2.19	yes	0.21	no
Hs_RPL13_4	6137	RPL13	1.05	no	0.43	no	0.19	no
Hs_RPL13_2	6137	RPL13	0.36	no	0.38	no	0.79	no
Hs_RPS6KA3_3	6197	RPS6KA3	0.52	no	1.19	no	1.1	no
Hs_RPS6KA3_4	6197	RPS6KA3	0.41	no	0.57	no	0.09	no
Hs_RPS6KB1_2	6198	RPS6KB1	0.61	no	1.15	no	1.01	no
Hs_RPS6KB1_4	6198	RPS6KB1	0.43	no	-0.55	no	0.74	no
Hs_SBF1_3	6305	SBF1	n.d.	no	n.d.	no	-1.26	no
Hs_SBF1_6	6305	SBF1	1.51	yes	1.09	no	0.61	no
Hs_SCNN1D_4	6339	SCNN1D	1.44	yes	1.83	yes	2.5	yes
Hs_SCNN1D_1	6339	SCNN1D	1.23	no	0.81	no	0.11	no
Hs_CCL16_4	6360	CCL16	0.74	no	1.64	yes	0.79	no
Hs_CCL16_3	6360	CCL16	0.48	no	0.83	no	0.23	no
Hs_SHBG_4	6462	SHBG	1.16	no	-0.66	no	1.11	no
Hs_SHBG_2	6462	SHBG	0.75	no	n.d.	no	0.24	no
Hs_SIAH1_6	6477	SIAH1	1.28	yes	1.76	yes	2.12	yes
Hs_SIAH1_2	6477	SIAH1	1.26	no	1.07	no	1.38	yes
Hs_SLC1A1_1	6505	SLC1A1	1.91	yes	1.85	yes	-0.01	no
Hs_SLC1A1_2	6505	SLC1A1	0.1	no	1.55	yes	1.32	yes
Hs_SLC4A1_1	6521	SLC4A1	2.09	yes	1.79	yes	0.76	no
Hs_SLC4A1_3	6521	SLC4A1	0.88	no	1.54	yes	-1.03	no
Hs_SLC7A1_4	6541	SLC7A1	0.78	no	1.34	no	0.55	no
Hs_SLC7A1_3	6541	SLC7A1	0.34	no	1.1	no	-0.4	no
Hs_SUMO2_2	6613	SUMO2	0.88	no	0.03	no	-2.59	no
Hs_SUMO2_3	6613	SUMO2	0.44	no	0.65	no	-1.98	no
Hs_SNAI1_5	6615	SNAI1	1.96	yes	n.d.	no	1.22	yes
Hs_SNAI1_3	6615	SNAI1	-1.15	no	-1.01	no	1.6	yes
Hs_SPINK1_4	6690	SPINK1	0.56	no	1.11	no	-0.77	no
Hs_SPINK1_2	6690	SPINK1	-0.26	no	n.d.	no	1.47	yes
Hs_SPINT1_8	6692	SPINT1	0.76	no	0.69	no	1.19	no
Hs_SPINT1_1	6692	SPINT1	0.13	no	-0.19	no	-0.82	no
Hs_SPP1_4	6696	SPP1	1.36	yes	1.88	yes	-0.55	no
Hs_SPP1_6	6696	SPP1	0.82	no	1.72	yes	1.59	yes
Hs_STYX_2	6815	STYX	1.15	no	1.52	yes	0.4	no
Hs_STYX_3	6815	STYX	0.55	no	0.8	no	0.18	no
Hs_TAP1_2	6890	TAP1	1.48	yes	2.63	yes	-0.13	no
Hs_TAP1_3	6890	TAP1	0.39	no	-0.02	no	0.48	no
Hs_TBCE_1	6905	TBCE	1.5	yes	1.98	yes	0.51	no
Hs_TBCE_4	6905	TBCE	-0.05	no	0.33	no	1.07	no
Hs_TBXA2R_3	6915	TBXA2R	n.d.	no	n.d.	no	-0.49	no
Hs_TBXA2R_4	6915	TBXA2R	1.76	yes	1.99	yes	1.18	no
Hs_TCF2_1	6928	HNF1B	n.d.	no	n.d.	no	0.05	no
Hs_TCF2_2	6928	HNF1B	2.15	yes	2.3	yes	1.4	yes
Hs_TEK_3	7010	TEK	0.95	no	1.08	no	0.01	no
Hs_TEK_5	7010	TEK	0.14	no	-0.04	no	1.49	yes
Hs_TGFB1_2	7040	TGFB1	0.39	no	1.05	no	0.37	no
Hs_TGFB1_4	7040	TGFB1	-0.71	no	-0.11	no	0.92	no
Hs_TK2_5	7084	TK2	n.d.	no	n.d.	no	0.55	no
Hs_TK2_1	7084	TK2	1.71	yes	2.35	yes	0.74	no
Hs_TKT_4	7086	TKT	1.57	yes	0.7	no	1.02	no
Hs_TKT_6	7086	TKT	-0.79	no	-0.07	no	1.08	no
Hs_TLOC1_2	7095	SEC62	-0.03	no	1.43	yes	-0.82	no
Hs_TLOC1_5	7095	SEC62	-0.88	no	-2.23	no	1.54	yes
Hs_TLR1_6	7096	TLR1	-0.08	no	0.65	no	0.98	no
Hs_TLR1_5	7096	TLR1	-0.84	no	-0.95	no	0.76	no
Hs_TMPRSS2_1	7113	TMPRSS2	1.14	no	1.57	yes	-0.04	no
Hs_TMPRSS2_4	7113	TMPRSS2	-0.44	no	1.18	no	0.6	no
Hs_TRPM2_4	7226	TRPM2	-0.14	no	n.d.	no	-0.25	no
Hs_TRPM2_2	7226	TRPM2	-0.6	no	-1.27	no	0.35	no
Hs_TSTA3_5	7264	TSTA3	1.97	yes	1.65	yes	1.44	yes
Hs_TSTA3_6	7264	TSTA3	1.49	yes	2.07	yes	1.46	yes
Hs_TTK_7	7272	TTK	0.03	no	-0.02	no	-0.19	no
Hs_TTK_6	7272	TTK	-0.61	no	-0.5	no	0.24	no
Hs_UBE2N_1	7334	UBE2N	1.73	yes	1.32	no	0	no
Hs_UBE2N_2	7334	UBE2N	-0.35	no	0.46	no	0.96	no
Hs_ZIC2_4	7546	ZIC2	0.33	no	0.8	no	0.43	no
Hs_ZIC2_1	7546	ZIC2	0.07	no	0.94	no	-1.12	no
Hs_TFEB_4	7942	TFEB	1.62	yes	2.07	yes	1.57	yes
Hs_TFEB_3	7942	TFEB	0.99	no	1.27	no	-0.39	no
Hs_LHX3_2	8022	LHX3	n.d.	no	n.d.	no	0.9	no
Hs_LHX3_4	8022	LHX3	1.42	yes	1.57	yes	-3.47	no
Hs_CUBN_1	8029	CUBN	n.d.	no	n.d.	no	1.83	yes
Hs_CUBN_2	8029	CUBN	0.83	no	1.01	no	1.39	yes
Hs_GAN_3	8139	GAN	0.94	no	1.43	yes	0.99	no
Hs_GAN_1	8139	GAN	0.15	no	1.21	no	0.8	no
Hs_SMC1L1_1	8243	SMC1A	1.78	yes	1.64	yes	0.79	no
Hs_SMC1L1_5	8243	SMC1A	1.65	yes	2.48	yes	-0.73	no
Hs_ARID1A_2	8289	ARID1A	n.d.	no	n.d.	no	1.87	yes
Hs_ARID1A_1	8289	ARID1A	0.3	no	1.08	no	2.22	yes
Hs_BAP1_1	8314	BAP1	n.d.	no	n.d.	no	-0.8	no
Hs_BAP1_2	8314	BAP1	n.d.	no	n.d.	no	1.22	yes
Hs_NME5_7	8382	NME5	1.14	no	0.42	no	0.89	no
Hs_NME5_1	8382	NME5	-0.9	no	-0.87	no	0.6	no
Hs_OR1E2_2	8388	OR1E2	0.79	no	0.82	no	1.51	yes
Hs_OR1E2_1	8388	OR1E2	0.73	no	0.72	no	-0.45	no
Hs_RAD54L_2	8438	RAD54L	2.19	yes	2.31	yes	1.39	yes
Hs_RAD54L_4	8438	RAD54L	1.14	no	1.1	no	1.11	no
Hs_YARS_5	8565	YARS	0.5	no	0.61	no	1.13	no
Hs_YARS_3	8565	YARS	-0.73	no	0.23	no	-0.12	no
Hs_NPFF_3	8620	NPFF	-1.4	no	0.05	no	1.58	yes
Hs_NPFF_1	8620	NPFF	-1.4	no	0.51	no	1.19	no
Hs_CDC2L5_5	8621	CDK13	0.51	no	0.55	no	0.37	no
Hs_CDC2L5_10	8621	CDK13	-1.85	no	-0.9	no	-1.03	no
Hs_PDE5A_4	8654	PDE5A	1.38	yes	1.24	no	-1.15	no
Hs_PDE5A_1	8654	PDE5A	0.95	no	1.38	yes	0.27	no
Hs_IRS2_2	8660	IRS2	-0.15	no	-0.41	no	0.67	no
Hs_IRS2_6	8660	IRS2	-0.73	no	-0.59	no	1.16	no
Hs_STX11_1	8676	STX11	0.06	no	0.4	no	0.96	no
Hs_STX11_2	8676	STX11	-0.14	no	-0.92	no	0.26	no
Hs_BECN1_3	8678	BECN1	1.95	yes	1.57	yes	0.11	no
Hs_BECN1_2	8678	BECN1	1.15	no	1.57	yes	-1	no
Hs_RIPK2_5	8767	RIPK2	3	yes	0.59	no	3.18	yes
Hs_RIPK2_7	8767	RIPK2	2.92	yes	0.28	no	2.65	yes
Hs_GALR2_4	8811	GALR2	n.d.	no	n.d.	no	-0.52	no
Hs_GALR2_3	8811	GALR2	-0.34	no	-1.17	no	0.37	no
Hs_WISP1_2	8840	WISP1	n.d.	no	n.d.	no	-0.26	no
Hs_WISP1_7	8840	WISP1	0.98	no	1.19	no	0.88	no
Hs_AIP_3	9049	AIP	n.d.	no	n.d.	no	-0.94	no
Hs_AIP_4	9049	AIP	1.11	no	0.35	no	-0.58	no
Hs_PKMYT1_6	9088	PKMYT1	n.d.	no	n.d.	no	-0.91	no
Hs_PKMYT1_2	9088	PKMYT1	2.54	yes	2.32	yes	0.68	no
Hs_CSPG6_6	9126	SMC3	1.6	yes	1.88	yes	-0.62	no
Hs_CSPG6_1	9126	SMC3	0.29	no	1.01	no	-1.15	no
Hs_COX7A2L_2	9167	COX7A2L	0.44	no	1.2	no	-0.58	no
Hs_COX7A2L_4	9167	COX7A2L	-0.03	no	0.18	no	-0.82	no
Hs_HTR3B_1	9177	HTR3B	0.97	no	1.52	yes	1.08	no
Hs_HTR3B_3	9177	HTR3B	0.37	no	1.13	no	0.98	no
Hs_SLC24A1_1	9187	SLC24A1	1.36	yes	1.68	yes	1.17	no
Hs_SLC24A1_3	9187	SLC24A1	-1.25	no	0.42	no	-0.01	no
Hs_GPR50_3	9248	GPR50	n.d.	no	n.d.	no	1.01	no
Hs_GPR50_4	9248	GPR50	1.11	no	n.d.	no	0.97	no
Hs_GPR52_1	9293	GPR52	0.9	no	0.5	no	0.12	no
Hs_GPR52_2	9293	GPR52	0.8	no	1.09	no	-0.08	no
Hs_TGM5_4	9333	TGM5	1.67	yes	1.38	yes	-0.69	no
Hs_TGM5_2	9333	TGM5	1.3	yes	2.03	yes	1.32	yes
Hs_TAOK2_10	9344	TAOK2	2.33	yes	2.51	yes	-1.09	no
Hs_TAOK2_10	9344	TAOK2	2.17	yes	2.55	yes	-1.09	no
Hs_NCOR2_4	9612	NCOR2	1.44	yes	0.66	no	1.55	yes
Hs_NCOR2_2	9612	NCOR2	0.26	no	0.85	no	1.13	no
Hs_MTL5_4	9633	MTL5	0.62	no	1.13	no	0.36	no
Hs_MTL5_1	9633	MTL5	-2.11	no	-1.3	no	-0.12	no
Hs_PHF14_9	9678	PHF14	1.16	no	1.83	yes	0.47	no
Hs_PHF14_6	9678	PHF14	0.86	no	-0.33	no	1.62	yes
Hs_HERPUD1_3	9709	HERPUD1	n.d.	no	n.d.	no	1.05	no
Hs_HERPUD1_5	9709	HERPUD1	1.62	yes	1.86	yes	0.29	no
Hs_HDAC9_4	9734	HDAC9	1.43	yes	0.6	no	-0.47	no
Hs_HDAC9_3	9734	HDAC9	0.63	no	-0.3	no	0.45	no
Hs_GPRASP1_3	9737	GPRASP1	0.66	no	1.23	no	1.22	yes
Hs_GPRASP1_2	9737	GPRASP1	0.48	no	1.54	yes	-3.16	no
Hs_KIAA0339_1	9739	SETD1A	0.85	no	0.43	no	1.22	yes
Hs_KIAA0339_4	9739	SETD1A	0.35	no	0.96	no	1.44	yes
Hs_RICS_3	9743	ARHGAP32	0.34	no	0.67	no	-2.96	no
Hs_RICS_4	9743	ARHGAP32	-1.39	no	-1.44	no	0.68	no
Hs_PCDHA9_11	9752	PCDHA9	1.65	yes	n.d.	no	1.32	yes
Hs_PCDHA9_9	9752	PCDHA9	-0.21	no	-1.7	no	0.89	no
Hs_SETDB1_2	9869	SETDB1	1.34	yes	1.55	yes	-0.28	no
Hs_SETDB1_1	9869	SETDB1	0.16	no	0.63	no	-1.15	no
Hs_TLK1_2	9874	TLK1	2.11	yes	1.96	yes	-1.39	no
Hs_TLK1_6	9874	TLK1	1.45	yes	0.91	no	0.79	no
Hs_MRC2_4	9902	MRC2	n.d.	no	n.d.	no	1.54	yes
Hs_MRC2_6	9902	MRC2	1.82	yes	n.d.	no	0.32	no
Hs_ABCB6_1	10058	ABCB6	1.94	yes	n.d.	no	0.89	no
Hs_ABCB6_2	10058	ABCB6	1.39	yes	1.71	yes	-1.83	no
Hs_UREB1_2	10075	HUWE1	n.d.	no	n.d.	no	1.57	yes
Hs_UREB1_3	10075	HUWE1	0.53	no	0.8	no	-2.4	no
Hs_DHRS2_2	10202	DHRS2	2.05	yes	n.d.	no	-0.98	no
Hs_DHRS2_3	10202	DHRS2	1.53	yes	2.01	yes	1.11	no
Hs_TRIB1_2	10221	TRIB1	1.67	yes	1.44	yes	-1.18	no
Hs_TRIB1_4	10221	TRIB1	1.15	no	0.82	no	0.74	no
Hs_RAMP3_4	10268	RAMP3	1.12	no	0.37	no	0.78	no
Hs_RAMP3_1	10268	RAMP3	0.99	no	1.35	no	-0.35	no
Hs_SIRPB1_7	10326	SIRPB1	2.04	yes	-0.48	no	0.75	no
Hs_SIRPB1_5	10326	SIRPB1	0.96	no	1.54	yes	-0.22	no
Hs_ABCA9_3	10350	ABCA9	0.75	no	1.94	yes	0.94	no
Hs_ABCA9_4	10350	ABCA9	-0.93	no	-0.31	no	0.74	no
Hs_CARD4_3	10392	NOD1	1.65	yes	1.99	yes	1.54	yes
Hs_CARD4_4	10392	NOD1	1.51	yes	n.d.	no	3.11	yes
Hs_ANAPC10_4	10393	ANAPC10	n.d.	no	n.d.	no	-0.89	no
Hs_ANAPC10_6	10393	ANAPC10	0.33	no	0.87	no	0.95	no
Hs_SMC2L1_1	10592	SMC2	1.21	no	1.83	yes	0.97	no
Hs_SMC2L1_7	10592	SMC2	0.39	no	1.37	no	1.25	yes
Hs_SLCO1B1_4	10599	SLCO1B1	1.12	no	1.66	yes	0.24	no
Hs_SLCO1B1_5	10599	SLCO1B1	0.38	no	1.09	no	-1.05	no
Hs_CD226_2	10666	CD226	1.09	no	n.d.	no	0.38	no
Hs_CD226_1	10666	CD226	0.84	no	1.35	no	1.52	yes
Hs_KIF1C_7	10749	KIF1C	n.d.	no	n.d.	no	2.53	yes
Hs_KIF1C_8	10749	KIF1C	0.44	no	0.27	no	0.16	no
Hs_RGS19IP1_2	10755	GIPC1	n.d.	no	n.d.	no	0.41	no
Hs_RGS19IP1_3	10755	GIPC1	n.d.	no	n.d.	no	1.73	yes
Hs_CYP46A1_3	10858	CYP46A1	0.99	no	1.27	no	0.02	no
Hs_CYP46A1_4	10858	CYP46A1	0.51	no	0.5	no	0.48	no
Hs_ADAM28_4	10863	ADAM28	0.9	no	0.85	no	-0.23	no
Hs_ADAM28_3	10863	ADAM28	0.78	no	1.19	no	1.46	yes
Hs_USP20_3	10868	USP20	2.03	yes	1.49	yes	1.08	no
Hs_USP20_1	10868	USP20	1.77	yes	2.28	yes	0.22	no
Hs_WDR3_2	10885	WDR3	0.07	no	0.35	no	0.63	no
Hs_WDR3_1	10885	WDR3	-0.47	no	0.36	no	-1.2	no
Hs_PPARGC1A_6	10891	PPARGC1A	1.38	yes	0.67	no	0.24	no
Hs_PPARGC1A_1	10891	PPARGC1A	-0.35	no	0.55	no	-0.4	no
Hs_MALT1_5	10892	MALT1	-0.19	no	0.69	no	0.37	no
Hs_MALT1_4	10892	MALT1	-0.49	no	0.15	no	1.27	yes
Hs_MMP24_2	10893	MMP24	0.05	no	0.1	no	-0.58	no
Hs_MMP24_3	10893	MMP24	-0.84	no	-1.15	no	1.02	no
Hs_XLKD1_6	10894	LYVE1	1.04	no	1.55	yes	0.31	no
Hs_XLKD1_8	10894	LYVE1	-0.63	no	-0.2	no	0.39	no
Hs_OGFR_4	11054	OGFR	n.d.	no	n.d.	no	-0.06	no
Hs_OGFR_1	11054	OGFR	1.23	no	1.41	yes	0.13	no
Hs_KLK8_4	11202	KLK8	1.71	yes	1.04	no	1.28	yes
Hs_KLK8_2	11202	KLK8	1.61	yes	1.16	no	0.69	no
Hs_PACSIN2_5	11252	PACSIN2	0.87	no	0.72	no	-0.21	no
Hs_PACSIN2_2	11252	PACSIN2	-0.54	no	0.86	no	2.21	yes
Hs_SCN11A_1	11280	SCN11A	1.35	yes	2.41	yes	1.95	yes
Hs_SCN11A_4	11280	SCN11A	0.61	no	0.92	no	-0.22	no
Hs_FKBP9_1	11328	FKBP9	1.2	no	0.59	no	0.51	no
Hs_FKBP9_3	11328	FKBP9	0.92	no	1.34	no	0.36	no
Hs_NID2_1	22795	NID2	1.45	yes	1.66	yes	0.38	no
Hs_NID2_2	22795	NID2	1.16	no	2.1	yes	0.66	no
Hs_ICK_1	22858	ICK	-0.18	no	0.42	no	1.91	yes
Hs_ICK_6	22858	ICK	-1.68	no	-0.85	no	-0.55	no
Hs_NALP1_5	22861	NLRP1	0.57	no	0.14	no	0.46	no
Hs_NALP1_3	22861	NLRP1	0.41	no	0.81	no	1.64	yes
Hs_POMZP3_2	22932	POMZP3	1.75	yes	2.18	yes	-1.03	no
Hs_POMZP3_4	22932	POMZP3	1.08	no	0.76	no	1.37	yes
Hs_KIAA1117_4	23033	DOPEY1	1.86	yes	1.86	yes	-1.42	no
Hs_KIAA1117_3	23033	DOPEY1	0.81	no	0.88	no	0.77	no
Hs_MAP3K7IP2_6	23118	TAB2	1.79	yes	1.68	yes	1.27	yes
Hs_MAP3K7IP2_2	23118	TAB2	1.49	yes	1.25	no	1.91	yes
Hs_GANAB_2	23193	GANAB	1.13	no	1.7	yes	1.14	no
Hs_GANAB_3	23193	GANAB	0.61	no	1.44	yes	1.39	yes
Hs_DTX4_1	23220	DTX4	n.d.	no	n.d.	no	1.21	yes
Hs_DTX4_3	23220	DTX4	-0.03	no	0.22	no	2.54	yes
Hs_MBC2_2	23344	ESYT1	n.d.	no	n.d.	no	0.17	no
Hs_MBC2_4	23344	ESYT1	-0.11	no	0.47	no	0.25	no
Hs_DAPK2_5	23604	DAPK2	1.69	yes	1.48	yes	-2.08	no
Hs_DAPK2_3	23604	DAPK2	0.27	no	2.1	yes	1.49	yes
Hs_NUP62_5	23636	NUP62	1.68	yes	1.66	yes	1.68	yes
Hs_NUP62_2	23636	NUP62	1.28	yes	1.72	yes	0.47	no
Hs_IL17R_1	23765	IL17RA	n.d.	no	n.d.	no	-1.07	no
Hs_IL17R_2	23765	IL17RA	0.71	no	-1.09	no	1.37	yes
Hs_BRMS1_1	25855	BRMS1	0.89	no	1.31	no	1.95	yes
Hs_BRMS1_4	25855	BRMS1	0.75	no	0.88	no	-1.11	no
Hs_OLFML2B_2	25903	OLFML2B	0.22	no	0.53	no	0.66	no
Hs_OLFML2B_5	25903	OLFML2B	0.01	no	0.38	no	1.64	yes
Hs_RIS1_1	25907	TMEM158	n.d.	no	n.d.	no	-0.34	no
Hs_RIS1_2	25907	TMEM158	0.3	no	1.22	no	0.12	no
Hs_GEMIN5_2	25929	GEMIN5	0.88	no	0.88	no	0.73	no
Hs_GEMIN5_1	25929	GEMIN5	0.45	no	0.38	no	1.31	yes
Hs_OR1A2_1	26189	OR1A2	1.07	no	0.67	no	1.14	no
Hs_OR1A2_6	26189	OR1A2	0.74	no	0.94	no	0.75	no
Hs_AK5_4	26289	AK5	1.36	yes	1.23	no	1.04	no
Hs_AK5_1	26289	AK5	0.8	no	0.47	no	2.01	yes
Hs_PTPN18_1	26469	PTPN18	1.63	yes	2.2	yes	1.38	yes
Hs_PTPN18_4	26469	PTPN18	1.33	yes	1.29	no	0.54	no
Hs_OR12D2_1	26529	OR12D2	1.81	yes	1.66	yes	2.5	yes
Hs_OR12D2_6	26529	OR12D2	-0.26	no	0.14	no	1.4	yes
Hs_OR2W1_4	26692	OR2W1	-0.83	no	-0.28	no	1.36	yes
Hs_OR2W1_1	26692	OR2W1	-1.78	no	-0.39	no	0.56	no
Hs_MLH3_4	27030	MLH3	0.54	no	0.25	no	1.49	yes
Hs_MLH3_2	27030	MLH3	0.07	no	1.17	no	0.65	no
Hs_POLL_2	27343	POLL	n.d.	no	n.d.	no	0.88	no
Hs_POLL_3	27343	POLL	n.d.	no	n.d.	no	0.95	no
Hs_CDH20_2	28316	CDH20	0.77	no	1.59	yes	0.28	no
Hs_CDH20_3	28316	CDH20	-0.35	no	0.1	no	0.27	no
Hs_TRIB2_2	28951	TRIB2	0.55	no	1.24	no	0.09	no
Hs_TRIB2_3	28951	TRIB2	-0.01	no	0.74	no	0.48	no
Hs_HSPC133_1	29081	METTL5	1.14	no	1.3	no	0.65	no
Hs_HSPC133_4	29081	METTL5	0.74	no	1.56	yes	-1.16	no
Hs_HUMGT198A_4	29893	PSMC3IP	n.d.	no	n.d.	no	-1.55	no
Hs_HUMGT198A_1	29893	PSMC3IP	n.d.	no	n.d.	no	0.68	no
Hs_SMARCAL1_1	50485	SMARCAL1	1.34	yes	n.d.	no	0.77	no
Hs_SMARCAL1_4	50485	SMARCAL1	0.13	no	1.04	no	1.51	yes
Hs_PLA2G3_3	50487	PLA2G3	n.d.	no	n.d.	no	1.03	no
Hs_PLA2G3_2	50487	PLA2G3	1.86	yes	1.99	yes	0.35	no
Hs_ANGPTL4_3	51129	ANGPTL4	1.37	yes	1.04	no	1.18	no
Hs_ANGPTL4_1	51129	ANGPTL4	0.26	no	n.d.	no	0.54	no
Hs_LOC51136_5	51136	RNFT1	-0.17	no	-0.49	no	-0.42	no
Hs_LOC51136_2	51136	RNFT1	-0.37	no	0.34	no	-1.88	no
Hs_PLCE1_2	51196	PLCE1	0.75	no	1.63	yes	0.58	no
Hs_PLCE1_1	51196	PLCE1	0.58	no	-0.17	no	-1.46	no
Hs_LUZP4_5	51213	LUZP4	0.67	no	0.86	no	0.3	no
Hs_LUZP4_1	51213	LUZP4	0.48	no	0.87	no	0.47	no
Hs_CDKL3_8	51265	CDKL3	0.89	no	0.65	no	1.5	yes
Hs_CDKL3_6	51265	CDKL3	0.67	no	0.59	no	1.11	no
Hs_SLC22A17_3	51310	SLC22A17	0.95	no	n.d.	no	1.59	yes
Hs_SLC22A17_1	51310	SLC22A17	0.29	no	1.39	yes	-0.75	no
Hs_MBTPS2_4	51360	MBTPS2	1.1	no	1.7	yes	-0.34	no
Hs_MBTPS2_2	51360	MBTPS2	0.07	no	0.38	no	0.6	no
Hs_EDD_3	51366	UBR5	1.68	yes	1.73	yes	1.36	yes
Hs_EDD_4	51366	UBR5	-1.03	no	0.32	no	0.66	no
Hs_RAB6B_1	51560	RAB6B	0.89	no	1.36	no	-0.76	no
Hs_RAB6B_2	51560	RAB6B	0.68	no	n.d.	no	0.99	no
Hs_MBD3_4	53615	MBD3	1.41	yes	0.82	no	0.73	no
Hs_MBD3_3	53615	MBD3	0.54	no	0.72	no	1.55	yes
Hs_MYO3A_2	53904	MYO3A	n.d.	no	n.d.	no	-0.07	no
Hs_MYO3A_3	53904	MYO3A	-1.7	no	-1.06	no	1.3	yes
Hs_GPR173_3	54328	GPR173	1.32	yes	2.13	yes	2.07	yes
Hs_GPR173_1	54328	GPR173	1.26	no	1.49	yes	-1.2	no
Hs_SSH1_3	54434	SSH1	n.d.	no	n.d.	no	1.62	yes
Hs_SSH1_1	54434	SSH1	1.43	yes	1.08	no	1.36	yes
Hs_RNF111_3	54778	RNF111	-0.63	no	-0.05	no	1.1	no
Hs_RNF111_2	54778	RNF111	-0.69	no	0.58	no	1.93	yes
Hs_FBXL12_4	54850	FBXL12	1.56	yes	0.67	no	0.33	no
Hs_FBXL12_1	54850	FBXL12	0.72	no	0.99	no	-0.06	no
Hs_C13orf11_2	55002	TMCO3	n.d.	no	n.d.	no	-1.42	no
Hs_C13orf11_3	55002	TMCO3	-2.34	no	-0.55	no	0.96	no
Hs_RNF31_1	55072	RNF31	2.29	yes	1.34	no	2.37	yes
Hs_RNF31_3	55072	RNF31	2.01	yes	1.62	yes	1.31	yes
Hs_TNFRSF19_4	55504	TNFRSF19	1.74	yes	1.88	yes	-0.52	no
Hs_TNFRSF19_2	55504	TNFRSF19	1.13	no	1.42	yes	0.74	no
Hs_DOK4_6	55715	DOK4	0.2	no	0.59	no	-0.36	no
Hs_DOK4_2	55715	DOK4	-0.08	no	-0.85	no	1.38	yes
Hs_SCN3B_4	55800	SCN3B	0.34	no	0.1	no	1.53	yes
Hs_SCN3B_1	55800	SCN3B	-0.01	no	0.59	no	0.17	no
Hs_PAG_6	55824	PAG1	1.36	yes	0.6	no	-0.08	no
Hs_PAG_8	55824	PAG1	-0.03	no	-0.73	no	-0.88	no
Hs_SHREW1_3	55966	AJAP1	n.d.	no	n.d.	no	0.24	no
Hs_SHREW1_2	55966	AJAP1	0.7	no	0.58	no	0.59	no
Hs_BTNL2_1	56244	BTNL2	0.57	no	1.32	no	-0.91	no
Hs_BTNL2_3	56244	BTNL2	0.3	no	0.88	no	1.19	no
Hs_BCCIP_8	56647	BCCIP	0.55	no	1.63	yes	0.62	no
Hs_BCCIP_2	56647	BCCIP	-1.44	no	-2.34	no	1.2	yes
Hs_KCNK12_1	56660	KCNK12	0.68	no	0.6	no	0.21	no
Hs_KCNK12_2	56660	KCNK12	0.4	no	0.2	no	1.74	yes
Hs_IFNK_1	56832	IFNK	n.d.	no	n.d.	no	-0.36	no
Hs_IFNK_4	56832	IFNK	0.34	no	-0.29	no	2.19	yes
Hs_LOC56920_5	56920	SEMA3G	0.12	no	0.46	no	0.27	no
Hs_LOC56920_2	56920	SEMA3G	-1.29	no	-1.04	no	-0.45	no
Hs_CHMP1B_1	57132	CHMP1B	0.47	no	0.64	no	1.3	yes
Hs_CHMP1.5_4	57132	CHMP1B	0.3	no	1.18	no	-0.16	no
Hs_USP31_2	57478	USP31	1.05	no	0.45	no	1.38	yes
Hs_USP31_1	57478	USP31	-0.26	no	0.64	no	-0.46	no
Hs_HECW2_2	57520	HECW2	1.78	yes	1.99	yes	1.3	yes
Hs_HECW2_5	57520	HECW2	0.32	no	-0.33	no	-0.63	no
Hs_AMSH-LP_4	57559	STAMBPL1	0.96	no	2.1	yes	1.51	yes
Hs_AMSH-LP_1	57559	STAMBPL1	0.69	no	0.99	no	0.6	no
Hs_KIAA1524_5	57650	KIAA1524	1.79	yes	1.77	yes	0.92	no
Hs_KIAA1524_1	57650	KIAA1524	1.08	no	0.51	no	1.29	yes
Hs_CYP4F11_1	57834	CYP4F11	0.37	no	n.d.	no	-0.09	no
Hs_CYP4F11_4	57834	CYP4F11	-1.13	no	n.d.	no	1.08	no
Hs_MLL3_3	58508	MLL3	1.59	yes	1.83	yes	0.87	no
Hs_MLL3_2	58508	MLL3	0.92	no	n.d.	no	-0.82	no
Hs_LGR7_2	59350	RXFP1	n.d.	no	n.d.	no	1.69	yes
Hs_LGR7_1	59350	RXFP1	0.39	no	0.97	no	-0.25	no
Hs_LGR6_2	59352	LGR6	1.95	yes	1.83	yes	1.56	yes
Hs_LGR6_3	59352	LGR6	-0.06	no	-0.58	no	0.41	no
Hs_GFRA4_2	64096	GFRA4	1.71	yes	1.62	yes	0.16	no
Hs_GFRA4_4	64096	GFRA4	0.96	no	1.28	no	1.09	no
Hs_CRLF2_5	64109	CRLF2	1.69	yes	1.79	yes	-0.83	no
Hs_CRLF2_2	64109	CRLF2	1.18	no	0.52	no	0.93	no
Hs_FLJ22405_3	64419	MTMR14	1.94	yes	2.02	yes	0.45	no
Hs_FLJ22405_1	64419	MTMR14	0.07	no	0.25	no	0.04	no
Hs_ANAPC1_8	64682	ANAPC1	n.d.	no	n.d.	no	2.08	yes
Hs_ANAPC1_2	64682	ANAPC1	n.d.	no	n.d.	no	1.48	yes
Hs_LPPR2_2	64748	LPPR2	n.d.	no	n.d.	no	-0.53	no
Hs_LPPR2_3	64748	LPPR2	0.15	no	-0.27	no	-1.71	no
Hs_MAPKAP1_5	79109	MAPKAP1	1.14	no	1.65	yes	0.43	no
Hs_MAPKAP1_2	79109	MAPKAP1	0.1	no	1.05	no	-0.58	no
Hs_MELL1_4	79258	MMEL1	n.d.	no	n.d.	no	1.1	no
Hs_MELL1_3	79258	MMEL1	1.33	yes	n.d.	no	1.15	no
Hs_OR7E91P_1	79315	OR7E91P	1.2	no	n.d.	no	1.14	no
Hs_OR7E91P_6	79315	OR7E91P	-0.11	no	0.53	no	0.02	no
Hs_TREML2_1	79865	TREML2	0.94	no	n.d.	no	0.42	no
Hs_TREML2_2	79865	TREML2	-0.06	no	n.d.	no	-0.37	no
Hs_HDAC11_1	79885	HDAC11	n.d.	no	n.d.	no	-0.23	no
Hs_HDAC11_2	79885	HDAC11	-1.59	no	n.d.	no	0.57	no
Hs_PAQR6_5	79957	PAQR6	0.1	no	0.54	no	1.05	no
Hs_PAQR6_2	79957	PAQR6	-1.09	no	-0.93	no	0.09	no
Hs_FLJ23322_3	80020	FOXRED2	-0.16	no	-0.16	no	0.74	no
Hs_FLJ23322_4	80020	FOXRED2	-0.87	no	1.06	no	0.26	no
Hs_BPIL1_2	80341	BPIL1	n.d.	no	n.d.	no	-0.67	no
Hs_BPIL1_1	80341	BPIL1	n.d.	no	n.d.	no	1.73	yes
Hs_KCNH6_3	81033	KCNH6	1.18	no	1.08	no	1.57	yes
Hs_KCNH6_2	81033	KCNH6	0.85	no	1.53	yes	1.01	no
Hs_TDRD3_4	81550	TDRD3	n.d.	no	n.d.	no	-0.06	no
Hs_TDRD3_2	81550	TDRD3	1.66	yes	2.25	yes	-0.81	no
Hs_LOXL4_1	84171	LOXL4	n.d.	no	n.d.	no	n.d.	no
Hs_LOXL4_5	84171	LOXL4	1.27	yes	1.1	no	1.33	yes
Hs_ATP13A4_1	84239	ATP13A4	1.48	yes	1.72	yes	0.3	no
Hs_ATP13A4_4	84239	ATP13A4	1.26	no	1.52	yes	1.43	yes
Hs_DDI2_3	84301	DDI2	0.93	no	0.66	no	1.44	yes
Hs_DDI2_1	84301	DDI2	-0.3	no	0.56	no	1.44	yes
Hs_PROK1_3	84432	PROK1	0.54	no	0.99	no	0.87	no
Hs_PROK1_1	84432	PROK1	-0.54	no	1.15	no	0.43	no
Hs_IL1F10_3	84639	IL1F10	0	no	-0.18	no	1.3	yes
Hs_IL1F10_1	84639	IL1F10	-0.12	no	0.05	no	1.18	no
Hs_LNX_4	84708	LNX1	0.38	no	0.42	no	1.28	yes
Hs_LNX_1	84708	LNX1	-1.55	no	-0.06	no	-0.2	no
Hs_FBXO18_1	84893	FBXO18	0.88	no	n.d.	no	1.03	no
Hs_FBXO18_4	84893	FBXO18	0.36	no	n.d.	no	-0.23	no
Hs_FIBCD1_3	84929	FIBCD1	1.29	yes	n.d.	no	-0.58	no
Hs_FIBCD1_1	84929	FIBCD1	-1.39	no	-1.18	no	0.1	no
Hs_SERPINB11_3	89778	SERPINB11	n.d.	no	n.d.	no	1.87	yes
Hs_SERPINB11_1	89778	SERPINB11	0.88	no	1.24	no	0.55	no
Hs_NYD-SP25_11	89882	TPD52L3	n.d.	no	n.d.	no	0.73	no
Hs_NYD-SP25_9	89882	TPD52L3	0.35	no	-0.34	no	-0.02	no
Hs_LOC89894_1	89894	TMEM116	n.d.	no	n.d.	no	-0.65	no
Hs_LOC89894_2	89894	TMEM116	0.43	no	0.31	no	1.14	no
Hs_KIFC2_6	90990	KIFC2	n.d.	no	n.d.	no	-0.19	no
Hs_KIFC2_3	90990	KIFC2	-0.24	no	-0.35	no	1.01	no
Hs_LOC91461_4	91461	PKDCC	1.06	no	1.35	no	0.67	no
Hs_LOC91461_1	91461	PKDCC	-0.51	no	0	no	1.22	yes
Hs_TIMD4_1	91937	TIMD4	1.13	no	0.92	no	-0.33	no
Hs_TIMD4_2	91937	TIMD4	0.62	no	0.09	no	1.09	no
Hs_MGC21874_3	93624	TADA2B	n.d.	no	n.d.	no	1.78	yes
Hs_MGC21874_1	93624	TADA2B	0.37	no	0.77	no	1.02	no
Hs_EGLN2_6	112398	EGLN2	2.22	yes	1.82	yes	0.71	no
Hs_EGLN2_10	112398	EGLN2	1.02	no	1.32	no	0.36	no
Hs_STX1B2_5	112755	STX1B	-0.11	no	0.72	no	1.09	no
Hs_STX1B2_1	112755	STX1B	-0.16	no	0	no	1.4	yes
Hs_LOC112885_3	112885	PHF21B	1.1	no	0.2	no	0.49	no
Hs_LOC112885_1	112885	PHF21B	0.48	no	0.73	no	-0.35	no
Hs_PLCD3_5	113026	PLCD3	1.29	yes	1.06	no	0.62	no
Hs_PLCD3_2	113026	PLCD3	-0.87	no	-0.06	no	1.53	yes
Hs_TXNL6_3	115861	NXNL1	n.d.	no	n.d.	no	-2.44	no
Hs_TXNL6_4	115861	NXNL1	1.09	no	0.89	no	0.82	no
Hs_LOC116143_2	116143	WDR92	1.28	yes	1.98	yes	-0.23	no
Hs_LOC116143_1	116143	WDR92	-0.44	no	-0.61	no	0.4	no
Hs_MRGX3_1	117195	MRGPRX3	1.71	yes	n.d.	no	-0.61	no
Hs_MRGX3_4	117195	MRGPRX3	0.27	no	0.11	no	0.82	no
Hs_FBXO36_2	130888	FBXO36	1.26	no	1.21	no	-0.81	no
Hs_FBXO36_3	130888	FBXO36	0.27	no	1.42	yes	1.49	yes
Hs_ASB15_2	142685	ASB15	n.d.	no	n.d.	no	0.56	no
Hs_ASB15_4	142685	ASB15	0.49	no	0.69	no	1.03	no
Hs_MGC20470_4	143630	UBQLNL	n.d.	no	-0.09	no	1.06	no
Hs_MGC20470_1	143630	UBQLNL	1.22	no	n.d.	no	1.99	yes
Hs_LOC146110_3	146110	RPL7P47	n.d.	no	n.d.	no	-1.61	no
Hs_LOC146110_4	146110	RPL7P47	0.32	no	0.51	no	0.27	no
Hs_PROCA1_3	147011	PROCA1	1.51	yes	1.95	yes	-0.63	no
Hs_PROCA1_1	147011	PROCA1	0.26	no	0.18	no	0.02	no
Hs_MAGI1_6	154043	CNKSR3	n.d.	no	n.d.	no	1.39	yes
Hs_MAGI1_5	154043	CNKSR3	1.7	yes	1.91	yes	-0.87	no
Hs_RASEF_1	158158	RASEF	0.96	no	1.15	no	-0.7	no
Hs_RASEF_7	158158	RASEF	-1.59	no	-0.14	no	1.41	yes
Hs_USP51_1	158880	USP51	0.78	no	1.6	yes	1.16	no
Hs_USP51_3	158880	USP51	0.55	no	1.32	no	1.22	yes
Hs_PATE_4	160065	PATE1	1.03	no	0.81	no	1.42	yes
Hs_PATE_1	160065	PATE1	0.91	no	0.7	no	1.41	yes
Hs_CLECSF13_4	165530	CLEC4F	1.01	no	0.54	no	1.14	no
Hs_CLECSF13_2	165530	CLEC4F	-0.5	no	-0.45	no	1.52	yes
Hs_DTX3_2	196403	DTX3	n.d.	no	n.d.	no	0.84	no
Hs_DTX3_3	196403	DTX3	1.49	yes	1.78	yes	0.06	no
Hs_DKFZp451J0118_2	200081	TXLNA	n.d.	no	n.d.	no	1.35	yes
Hs_DKFZp451J0118_5	200081	TXLNA	0.87	no	0.73	no	-0.22	no
Hs_HTRA4_2	203100	HTRA4	n.d.	no	n.d.	no	1.17	no
Hs_HTRA4_1	203100	HTRA4	1.7	yes	1.74	yes	0.43	no
Hs_MGC35295_3	219995	MS4A15	n.d.	no	n.d.	no	0.89	no
Hs_MGC35295_1	219995	MS4A15	2.04	yes	2.62	yes	0.46	no
Hs_GPR114_4	221188	GPR114	1.04	no	1.24	no	1.16	no
Hs_GPR114_3	221188	GPR114	0.14	no	1.33	no	1.08	no
Hs_URP_6	257313	UTS2D	1.64	yes	1.62	yes	1.17	no
Hs_URP_5	257313	UTS2D	1.08	no	0.87	no	0.35	no
Hs_ALS2CL_1	259173	ALS2CL	n.d.	no	n.d.	no	-1.23	no
Hs_ALS2CL_4	259173	ALS2CL	1.89	yes	0.96	no	1.82	yes
Hs_LOC284021_3	284021	C17orf60	0.58	no	1.36	no	0.68	no
Hs_LOC284021_2	284021	C17orf60	0.44	no	0.76	no	1.49	yes
Hs_CLECSF8_5	338339	CLEC4D	1.27	yes	-0.49	no	0.57	no
Hs_CLECSF8_1	338339	CLEC4D	0.32	no	0.9	no	1.37	yes
Hs_RLN3R2_3	339403	RXFP4	1.36	yes	2.19	yes	-0.93	no
Hs_RLN3R2_1	339403	RXFP4	1.01	no	1.33	no	1.03	no
Hs_TREML1_3	340205	TREML1	n.d.	no	n.d.	no	0.92	no
Hs_TREML1_2	340205	TREML1	0.22	no	-0.05	no	0.04	no
Hs_CYP26C1_4	340665	CYP26C1	1.87	yes	2.62	yes	0.24	no
Hs_CYP26C1_1	340665	CYP26C1	0.4	no	n.d.	no	0.82	no
Hs_LOC343413_2	343413	FCRL6	1.83	yes	2.03	yes	0.35	no
Hs_LOC343413_1	343413	FCRL6	1.4	yes	n.d.	no	-2.83	no
Hs_LGICZ_3	353174	ZACN	1.39	yes	1.08	no	0.23	no
Hs_LGICZ_2	353174	ZACN	0.89	no	1.13	no	0.56	no
Hs_KIF7_1	374654	KIF7	n.d.	no	n.d.	no	-0.59	no
Hs_LOC374654_1	374654	KIF7	0.57	no	-0.11	no	1.7	yes
Hs_CCL4L1_4	388372	CCL4L2	0.51	no	-0.15	no	0.81	no
Hs_CCL4L1_1	388372	CCL4L2	-0.3	no	-0.16	no	0.49	no
Hs_LOC388579_3	388579	LOC388579	n.d.	no	n.d.	no	0.81	no
Hs_LOC388579_2	388579	LOC388579	0.76	no	1.06	no	0.66	no
Hs_LOC389207_3	389207	GRXCR1	n.d.	no	n.d.	no	0.91	no
Hs_LOC389207_4	389207	GRXCR1	0.83	no	1.76	yes	0.31	no
Hs_LOC389289_3	389289	C5orf39	1.21	no	1.28	no	-0.92	no
Hs_LOC389289_1	389289	C5orf39	-0.42	no	-0.72	no	0.6	no
Hs_LOC390003_1	390003	GUCY2GP	n.d.	no	n.d.	no	0.1	no
Hs_LOC390003_2	390003	GUCY2GP	1.05	no	1.39	yes	1.31	yes
Hs_LOC390233_2	390233	LOC390233	n.d.	no	n.d.	no	0.19	no
Hs_LOC390233_4	390233	LOC390233	-0.06	no	1.22	no	0.55	no
Hs_LOC388097_3	n.a.	LOC388097	1.53	yes	1.77	yes	n.d.	no
Hs_LOC388097_4	n.a.	LOC388097	1.18	no	1.69	yes	n.d.	no
Hs_LOC100129253_4	n.a.	LOC100129253	1.08	no	1.95	yes	n.d.	no
Hs_LOC390896_2	n.a.	LOC390896	-0.85	no	1.16	no	n.d.	no
